# Index for Volume 52 (2003)

*Syst. Biol.* 52(6):876–911, 2003  
Copyright © Society of Systematic Biologists  
ISSN: 1063-5157 print / 1076-836X online  
DOI: 10.1080/10635150390276444

COMPILED BY JOE MADIA

- 12S rDNA, 407, 727, 798–799  
12S rRNA, 39, 42, 56–58, 161, 163–165, 167, 181, 206–207, 209–212, 215, 218, 297, 440, 443, 445–447, 451, 456, 460, 462–467, 605  
16S mtDNA, 738  
16S rDNA, 72–76, 407, 727, 798–799  
16S rRNA, 206–207, 209–212, 215, 219, 297–298, 307, 440, 443, 445–447, 451, 456, 460, 462–467, 557, 559, 618–640, 758–759, 762  
18S rDNA, 57, 72–75, 820, 823  
18S rRNA, 283–295, 296, 298, 307, 311–333, 557, 559  
26S rDNA, 820, 823  
28S rDNA, 57, 72–75  
28S rRNA, 285, 287, 298, 307, 557, 559, 618, 620–623, 745–756
- A2AB, 605, 614–615  
A6, 674  
Abdo, Zaid, *see* Minin, Vladimir, 674–683  
*Acacia*  
  *koa*, 820  
*Acaenosuchus*, 241–243, 250–251  
*Acanthalictus*, 24, 26, 32  
Acari, 298, 430  
Acaridae, 430  
*accD*, 336  
Accelerated likelihood surface exploration: the likelihood ratchet,  
  R. A. Vos, 368–373  
Accuracy, 55–65, 428–435  
*Achalinus*, 451  
  *rufescens*, 440  
Achramorpha, 314–315, 328, 333  
*Acleisanthes*, 334–351  
  *acutifolia*, 341, 343  
  *angustifolia*, 341–343, 349  
  *chenopodioides*, 341  
  *crassifolia*, 347  
  *lanceolata*, 341, 348  
  *longiflora*, 347  
  *parvifolia*, 341, 347–348  
  *purpusiana*, 341  
  *undulata*, 341, 343, 349  
  *wrightii*, 343, 347  
*Aclys*, 758, 775  
  *concinna*, 758  
*Acomastylis*, 374  
*Acrocera bulla*, 756  
Acroceridae, 756  
Acrochordidae, 439–440, 442, 447, 455, 457  
*Acrochordus*, 439, 442–443, 451–452, 457  
  *granulatus*, 440  
  *javanicus*, 440  
Adams consensus tree, 850  
Adams, Dean C., *see* Naylor, Gavin J. P., 864–865  
Adams, Richard J., *see* Johnson, Kevin P., 37–47  
Adams tree, 463  
Adaptation, 501–514  
Adaptive radiation, 70, 89–92, 207  
Advanced snakes, 439–459  
*Aepyroceros*, 209, 212, 215  
  *melampus*, 210  
Aepycerotini, 209–210  
Aetosaur, 253–255  
  phylogeny, 852  
Aetosauria, 239  
*Aetosauroides*, 241, 243, 248, 250–252  
  *scagliai*, 250  
*Aetosaurus*, 241–243, 248, 250–252  
Affine, 66–69  
African elephants, 591  
Agamidae, 757  
Agamid lizards, 758  
Agaricales, 430  
*Agkistrodon*, 447, 451  
  *contortrix*, 440  
*Agrionemis exsudans*, 94  
Agriocnemus, 94  
*Ailurus fulgens*, 846  
Akaike Information Criterion (AIC), 79, 89, 95, 824  
Alethinophidia, 440  
*Alexeter* sp., Alcini, 209  
Algae, 430, 518, 524  
Algorithm, 696–704  
Alinkidae, 751  
Alivon, Eliane, *see* Manuel, Michael, 311–333  
Alcelaphini, 209–210  
Alleles, 374  
  mitochondrial, 41  
  nuclear, 41, 103  
*Alleno pithecus nigroviridis*, 736  
Alligator, American, 388  
Alligator, 391, 409  
  *mississippiensis*, 286–287, 386, 388, 391, 405  
  *sinensis*, 405  
Alligatoridae, 394, 396  
Alligatoridea, 403, 405, 408–409, 412, 415  
Allodape, 5, 7–8  
  *mucronata*, 2  
  *skaifeorum*, 2  
Allodapine, 2, 7–9, 11  
  bees, 1  
Allodapini, 1–14  
*Allodapula*, 2, 9–10, 12  
*Allodapulodes*, 9  
Allopolyploidy, 374–385  
Allothyrsus sp., 300, 306  
Allozyme, 23, 504, 506, 508–509  
  trees, 509  
 $\alpha$ -lactalbumin, 206, 209–212, 215, 218–220

- Alsinidendron*, 832  
 Alsonoideae, 833  
*Alsophis*, 447, 451  
     *portoricensis*, 440  
 Amato, George, *see* Gatesy, John, 403–422  
 Amber fossils, 746  
*Amblonyx*, 590  
     *cinereus*, 573, 577  
*Amblyomma*, 299, 304, 309–310  
     *americanum*, 299  
     *cajennense*, 299  
     *finbriatum*, 299  
     *glebopalma*, 299  
     *hebraeum*, 299, 306  
     *latum*, 299  
     *maculatum*, 299  
     s.l., 310  
     *varanensis*, 299  
     *variegatum*, 299  
     *vikirri*, 299  
 Amblyomminae, 299  
 Amblypygi, 62  
*Ambystoma mexicanum*, 287  
 American alligator, 388  
 Amino acids, 3, 6, 10, 95, 165, 296, 585, 594, 596, 605, 662  
*Ammocrypta*, 491, 493, 496–499  
     *beanii*, 491, 497, 499  
     *vivax*, 491, 496–497, 499  
 Among-site rate variation, 604–617  
 Amphibians, 286, 524  
 Amphimerycidae, 222  
 Amphimeryx, 222  
 Amphoriscidae, 314  
*Amphoriscus*, 314–315, 332  
 Analysis,  
     Bayesian, 26, 30, 89, 96, 102, 133, 140, 152, 165, 167, 181–182, 211, 390,  
         439–459, 477–487, 571, 576, 583, 604–617, 618, 621, 623, 629, 665,  
         681, 708, 713–714, 760, 797, 801–803, 807  
     Bayesian information, 377  
     biogeographic, 258, 761, 824  
     biotic element, 717–723  
     bootstrap, 7, 26, 447, 580, 609, 611, 621, 697, 775, 824, 841  
     Bremer support, 211  
     canonical correspondence, 687–689, 693  
     canonical variate, 190, 196, 198, 491, 496  
     cladistic, 9, 81, 253, 403, 541, 572, 738  
     cluster, 194, 205, 497, 722  
     continuous jackknife function (CJF), 55–58, 61–63  
     copath, 41  
     cophylogenetic, 737  
     correspondence, 687  
     cytogenetic, 374  
     decay (*see also* Bremer support), 128, 243, 407  
     distance, 334, 343  
     DNA, 551  
     generalized Procrustes, 66, 68  
     genetic, 197  
     jackknife, 407  
     Jungles, 39, 43, 45  
     likelihood, 18, 263, 374, 708, 715, 803–804, 807  
     local clock, 89, 715  
     logDet, 3, 6–7, 11  
     Markov Chain Monte Carlo, 140, 213, 486, 750, 801  
     maximum likelihood, 1, 3, 7, 11, 26–27, 30, 42, 63, 76, 79, 89, 95–97,  
         99, 166–167, 171, 182, 211–212, 215, 231, 318, 322, 327, 329, 341,  
         377–378, 386, 389–90, 394–396, 407, 419, 715, 737, 740, 760, 797,  
         801, 824, 850  
         maximum parsimony, 3, 5–7, 10–11, 95, 166–167, 182, 211, 213, 215,  
             275, 317, 322, 327, 737, 797, 801  
         molecular, 103–104, 221, 323, 386, 397, 542  
         molecular dating, 375  
         morphological, 187, 213, 323, 501, 504, 541, 560, 605, 858  
         morphometric, 197  
         multigene, 604  
         multivariate, 652  
         neighbor-joining, 463, 530, 532  
         nested-clade, 159–185  
         NHML, 390  
         nonparametric bootstrap, 166  
         paleontological, 605  
         parsimony, 7, 26, 30, 42, 45, 70, 76, 79, 83, 249, 251, 255, 257, 260, 262,  
             271–280, 336, 377, 389–390, 392, 406, 412, 423, 506, 508, 530, 554,  
             571, 575, 583, 618, 620–621, 623, 629, 727, 764, 802, 804, 824  
         partitioned, 4, 396, 604–617  
         partitioned likelihood, 386–402  
         phylogeographic, 461  
         principal component, 687  
         principal coordinate, 860  
         reconciliation, 39, 42  
         redundancy, 687  
         regression, 68  
         relative warp, 198  
         reweighted, 318  
         sensitivity, 554–564  
         sequence, 737  
         SSR, 612  
         stability, 554–564  
         star topology, 481  
         statistical, 131, 847  
         supermatrix, 724, 726, 728, 853  
         supertree, 725–726, 728, 853  
         total evidence, 839  
         tree-reconstruction, 182  
         UPGMA cluster, 488, 491, 493, 496–497  
         variable rate, 751  
     *Anamixilla*, 314–315, 320, 322–324  
         *torresi*, 316  
     *Anas platyrhynchos*, 286  
     Anatomical characters, 742  
     Ancestral character state reconstruction, 820–841  
     Ancient Allopolyploid speciation in Geinae (Rosaceae): evidence  
         from nuclear granule-bound starch synthase (GBSSI) gene  
         sequences, Jenny E. E. Smedmark, Torsten Eriksson, Rodger  
         C. Evans, and Christopher S. Campbell, 374–385  
     Andayani, Noviar, *see* Evans, Ben J., 794–823  
     *Anemonia sulcata*, 316  
     Angiosperms, 346, 348, 518, 524, 753, 784  
     Animals, 89, 591, 736, 742, 820  
     Anisopodidae, 756  
     *Anocentor*, 305  
     *Anolis*, 423, 105  
     Anomalodesmata, 557  
     Anomaluridae, 605–606, 614  
     Anomaluroidea, 614–615  
     Anomaluromorpha, 605–606  
     *Anonyx*, 590  
         *capensis*, 573–574, 576–577  
     *Anopheles*, 746, 754  
         *gambiae*, 745  
     *Anseranas semipalmata*, 388  
     *Antedon*, 317  
         *serrata*, 316  
     Antelope, 206  
     Anthophyte, 787–788

- Anthropoids, 48, 53, 709, 711–713
- Antilocapra*, 207, 209, 212–213, 215, 218, 220–221  
*americana*, 210, 219, 224
- Antilocapridae, 206–207, 209–210, 212–213, 218–219, 224
- Antilocaprinae, 210, 218
- Antilopini, 209–210
- Antipathes lata*, 316
- Ants, 23, 33
- Aotus* 740–742  
*nancymai*, 736, 738, 742
- Aparallactinae, 447
- Aparallactus, 446, 451, 455–456  
*guentheri*, 440, 459  
*wernerii*, 440
- Apes, 524, 707–708
- Aphids, 23, 137, 139–140, 143, 146
- Aphroceras*, 314–315, 332
- Aphylophorales, 430
- Apidae, 1
- Apiocera haruspex*, 756
- Apioceridae, 746, 750
- Apis mellifera*, 26, 28, 296
- Aplocheiloid fishes, 549–553
- Aplocheilidae, 548, 552
- Aplocheiloidei, 552
- Apodontia rufa*, 606
- Apodontidae, 605–606, 608, 614
- Aplopappus, 33
- Aplopeltura*, 451  
*boa*, 440, 446
- Aplysilla sulfurea*, 316
- Approximately unbiased test, 781–793
- Aprasia*, 757–758, 762, 764, 767, 770–771, 773, 776–777  
*aurita*, 759  
*fusca*, 759, 776  
*inaurita*, 759  
*parapulchella*, 759, 776  
*picturata*, 759  
*pseudopulchella*, 759, 776  
*pulchella*, 759, 776  
*repens*, 759, 776  
*rostrata*, 758, 776  
*smithi*, 759  
*striolata*, 759, 770
- Apterygota, 328
- Apteryx*  
*australis*, 286, 471–472, 474  
*mantelli*, 471, 474
- Apus affinis*, 286
- Arachnids, 56, 61, 299
- Araneae, 62, 70, 300, 557
- Araneid, 56, 61
- Araneidae, 57
- Archaea, 659
- Archaeognatha, 557
- Archaeomerycidae, 222
- Archaeomeryx*, 222
- Archeoglobus fulgidus*, 659
- Archosauria, 403, 833
- Archosaurs, 239–240, 253–255
- Arctocyon*, 858
- Arctonyx*, 581, 590  
*collaris*, 573, 577, 582
- Area of endemism, 271–280, 717–723
- Arecaceae, 346
- Are the dental data really at odds with the molecular data?  
Morphological evidence for the whale phylogeny  
(re)reexamined, Maureen A. O’Leary, John Gatesy, and  
Michael J. Novacek, 853–866
- Argasidae, 300, 309
- Argasinae, 300
- Argas lagenoplastis*, 300
- Argia*, 94  
*sedula*, 94
- Aris-Brosou, Stéphane, Least and most powerful phylogenetic tests to  
elucidate the origin of the seed plants in the presence of  
conflicting signals under misspecified models,  
781–793
- Arnedo, Miquel, *see* Hormiga, Gustavo, 70–88
- Arthropeas magnum*, 756
- Arthropods, 70, 107, 296, 299–300, 304–305, 307, 518, 557
- Artibeus jamaicensis*, 462–464
- Articulata, 518, 520
- Artiodactyla, 15–22, 724–729, 854–855, 857–858
- Artiodactylans, 853, 857, 860  
hippopotamid, 854  
suine, 854
- Ascaltis*, 314–315, 332–333
- Ascandra*, 314–315, 332–333  
*falcata*, 332  
*minchini*, 332
- Ascomycetes, 430
- Asilidae, 750, 756
- Asiloidea, 750, 753
- Asioryctes*, 858
- Aspidelaps*, 451  
*scutatus*, 440
- Assessing progress in systematics with continuous jackknife function  
analysis, Jeremy A. Miller, 55–65
- Assumptions, 352–367
- Asteraceae, 348, 820, 823
- Astigmata, 430
- Asymptomatic enumeration, 110–118
- atp6*, 657, 659  
*atp8*, 656–659
- Atelestidae, 756
- Atelestus pulicarius*, 756
- Atherinomorpha, 549
- Atractaspidae, 439–440, 455–456
- Atractaspinae, 440, 447
- Atractaspis*, 451, 455  
*bibronii*, 440  
*corpulenta*, 440  
*micropholis*, 440
- Augochlorini, 23
- Australia, 757–780
- Australictus*, 24
- Austrevylaeus*, 24, 26, 30
- Autopomorphic characters, 865
- Aves, 37, 394, 403–422
- Avian DNA, 389
- Avila, Luciano J., *see* Morando, Mariana, 159–185
- Axial symmetry, 311–333
- Axinella polypoides*, 316
- Azemiops*, 451, 453  
*feae*, 440, 453
- Azemiophinae, 440
- Badgers, 571–573  
American, 571–573  
Chinese ferret, 573  
Eurasian, 573  
hog, 573  
honey, 572

- Old World, 577, 590  
 stink, 573  
 Baeriida, 314, 317–318, 320, 323–324, 329–330  
 Baeriidae, 314, 320, 323  
*Balaenoptera*, 209, 211–213, 215  
   *physalus*, 210  
 Balaenopteridae, 209–210  
*Balaenoptera*, 706, 712  
 Balanidae, 557  
 Barker, Nigel P., *see* Kelly, Christopher M., 439–459  
 Barker, Stephen C., *see* Murrell, Anna, 296–310  
 Barnacles, 557  
 Barriel, Véronique, *see* Hugot, Jean–Pierre, 735–744  
 Basidiomycetes, 525  
 Basidiomycotina, 430  
*Bassariscus astutus*, 573  
 Bats, 57, 462, 472  
   short-tailed, 460  
 Bayesian, 48–54  
   analysis, 26, 30, 89, 96, 102, 133, 140, 152, 165, 167, 181–182, 211, 390, 439–459, 477–487, 571, 576, 583, 604–617, 618, 621, 623, 629, 665, 671, 708, 713–714, 745–756, 760, 797, 801–803, 807  
   approach, 171, 791  
   consensus tree, 622  
   estimation, 131–158, 394, 714, 745  
   factors, 48–50, 52–54, 649–664  
   framework, 48–49, 95, 372, 650, 666, 714, 760, 790–791  
   hypothesis, 100  
   inference, 48, 386, 442, 444–446, 642, 665–673  
   information analysis, 377  
   information criteria (BIC), 675–676, 719  
   methods, 23, 48, 159, 477, 696–697, 705–716, 726, 748, 801  
   model, 49, 650, 791  
   model selection, 674–683  
   phylogenetics, 48, 54, 89–109, 652  
   posterior probability, 30, 102, 215, 396, 554, 559, 612–613, 665–673  
   relaxed clock, 206–228  
   support, 623  
   tests, 607, 615  
   theorem, 48, 136, 267, 650, 655  
   trees, 30, 100, 167, 455, 457, 589, 750, 762, 764, 767, 771, 773, 802  
 Bears, 711–713, 794  
*Bedfordia*, 91, 94, 96  
   sp., 102  
 Bees, 1–14, 23–26  
   allodapine, 1  
   corbiculate, 23, 33  
   halictid, 23–24, 33  
   honey, 26  
 Beetles,  
   carabid, 70, 103  
   *Ips*, 677  
   longhorn, 89  
 Bennettitales, 753  
 Bennett, Jonathan R., *see* Scotland, Robert W., 539–547  
*Bernissartia*, 412  
*Beroe*, 317  
   *cucumis*, 316  
 Best-fit trees, 4  
 $\beta$ 2-microglobulin, 738  
 $\beta$ -casein, 207  
 $\beta$ -tubulin, 596, 598–600  
*Bicatillus*, 619, 623, 639  
   *extinctorum*, 623  
 Bidirectional sequencing, 2  
 Bifurcating tree (*see also* binary tree), 642  
 Bilateria, 311, 316–318, 320  
 Binary  
   characters, 244, 247, 256–257, 335, 535  
   coding, 841  
   tree (*see also* bifurcating tree), 114  
 Bininda-Emonds, Olaf R. P., Novel versus unsupported clades:  
   assessing the qualitative support for clades in MRP supertrees,  
   839–851  
 Bininda-Emonds, Olaf R. P., Kate E. Jones, Samantha A. Price, Richard  
 Grenyer, Marcel Cardillo, Michael Habib, Andy Purvis, and  
 John L. Gittleman, Supertrees are a necessary not-so-evil: a  
 comment on Gatesy et al., 724–729  
 Biochemical tree, 403  
 Biodiversity crisis, 428–435  
 Biogeographic, 552  
   analysis, 258, 761, 824  
   barriers, 618–640  
   history, 552, 722  
   inference, 618  
   pattern, 820  
   studies, 777  
 Biogeography, 7, 70–88, 240, 255–258, 430, 509, 618, 622, 717–723,  
   757–780, 794, 812, 820–841  
   historical, 271–280  
 Bioinformatics, 119–124  
 Biostratigraphy, 240  
 Biosynthetic pathways, 334–335, 337, 339, 342, 346, 348  
 Biotic elements, 271–280, 717–723  
 Biotic element analysis in biogeography, Bernhard Hausdorf and  
 Christian Hennig, 717–723  
 Birds, 41, 45–46, 230, 283–287, 293, 334, 391, 404, 549–551, 777–778  
   ratite, 549–553  
 Birth–death  
   model, 641, 644–645, 647, 761  
   process, 132, 641–648  
*Bitis*, 451  
   *arietans*, 440, 459  
*Blackburnia*, 103  
 Black caiman, 388  
 Black ravens, 353  
 Black-tailed deer, 210  
 Blesbok, 210  
 Blouin, Christian, *see* Susko, Edward, 594–603  
 Blow flies, 745  
*Boa*, 447, 451  
   *constrictor*, 440, 443, 447  
 Boaedontinae, 455  
 Body shape variation, 488–500  
 Boidae, 440  
*Boiga*, 447, 451, 457  
   *cynodon*, 440  
   *dedrophila*, 440  
 Boiginae, 457  
 Boleichthys, 492–493  
 Boleostoma, 492–493  
 Bollback, Jonathan P., *see* Harshman, John, 386–402  
 Bollback, Jonathan P., *see* Huelsenbeck, John P., 131–158  
*Bolyphantes alticeps*, 73, 88  
 Bombinatoridae, 794  
 Bombyliidae, 749–750, 754  
*Bombylius*, 754  
   *major*, 756  
 Bonferroni  
   adjustment, 723  
   correction, 16, 279, 686, 783, 807  
   procedure, 802  
*Boophilus*, 299, 305–306, 310  
   *annulatus*, 299, 306

- decoloratus*, 299  
*geigyi*, 299  
*kohlsi*, 299  
*microplus*, 298–299, 306
- Bookstein, Fred, *see* Rohlf, F. James, 66–69
- Bootstrap, 3, 39, 41, 43, 95, 99, 128–129, 554, 556, 559, 561, 575–576, 589, 600, 665–673, 737, 791, 841  
 analysis, 7, 26, 447, 580, 609, 611, 621, 697, 775, 824, 842  
 consensus, 30, 32, 802  
 consensus trees, 609  
 estimates, 599  
 frequencies, 839, 842, 844, 847  
 maximum likelihood, 667–668  
 nonparametric, 166, 506, 594, 665–667, 669, 671–672, 726, 760, 790, 801  
 parametric, 18, 598, 667, 726, 757–780, 781  
 percentages, 102, 211, 249, 737, 762, 781–793  
 proportion, 129  
 RELL, 390  
 replicates, 42, 44, 477, 479–481, 621, 823  
 support, 4–8, 26, 30, 42, 55, 62, 95, 167, 218, 444, 446, 467–468, 508, 540, 576–577, 581–583, 608–609, 611, 614, 621, 623, 738, 764, 829, 842, 844  
 trees, 251, 380–381, 451, 455, 465  
 value, 5, 7, 45, 95, 101–102, 211, 289, 320, 322, 336, 378, 477, 480, 484, 504, 506, 508, 510, 557, 576, 588, 609–610, 614–615, 665, 667, 727, 738, 748, 760, 802, 826–829
- Borchellini, Carole, *see* Manuel, Michael, 311–333
- Boreallodapini, 2
- Borealosuchus* ssp., 409
- Boronia*, 347
- Bos*, 209, 706  
*taurus*, 210–212, 405
- Boselaphini, 209–210
- Boselaphus*, 209–212  
*tragocamelus*, 210
- Bostrycapulus*, 619, 623, 631, 636, 639  
 cf. *aculeata* sp.1, 631
- Bothriocroton*, 300, 304–307, 309  
*concolor*, 300  
*undatum*, 300
- Bothriocrotoninae, 300, 307
- Boulengerina, 447, 451  
*annulata*, 440  
*fasciatus*, 440  
 sp., 440
- Boury-Esnault, Nicole, *see* Manuel, Michael, 311–333
- Bovidae, 206–228
- Bovinae, 210, 218–219
- Bovini, 209
- Brachycera, 745–756
- Brachylinga* sp., 756
- Branch-and-bound search, 368, 377, 390
- Branchiopoda, 557
- Branch and bound search, 479
- Branch length, 22, 41, 45, 48–50, 52, 76, 81–82, 96, 127–130, 133–135, 137, 156, 211–212, 223, 358–359, 377, 412, 415, 424, 427, 478, 481, 484–485, 508, 529–531, 535, 575, 589, 596, 608, 621, 629, 641, 644, 651–652, 655, 666–667, 671–672, 675, 692, 696–697, 699–700, 703, 709, 761, 782, 784–785, 791, 820, 825, 827, 831–832, 834–835, 841, 849–851, 865–866  
 error, 679–681  
 estimates, 396, 676–677, 682, 747
- Branch lengths and support, Mark Wilkinson, François-Joseph Lapointe, and David J. Gower, 127–130
- Branch lengths and support: revisited, David A. Morrison, 849–851
- Branch support (*see also* bootstrap, clade support, decay, posterior probability), 15, 26, 30, 211, 323, 407, 773  
 partitioned, 15–22, 76, 79, 407, 409, 412
- Branch-swapping, 30, 368–370, 842, 857  
 algorithm, 287, 371  
 NNI, 372  
 TBR, 39, 75, 166, 275, 318, 336, 377–378, 390, 407, 444–445, 463, 504, 506, 575, 607, 621–622, 666, 681, 748, 760, 801, 823–824
- Brassica*, 374
- Braun, Michael, *see* Harshman, John, 386–402
- Braunsapis*, 2, 5, 7  
*paradoxa*, 2  
*protuberans*, 2  
*unicolor*, 2  
*vitrea*, 2
- BRCA1, 605, 613–615
- Bremer  
 analysis, 211  
 support (*see also* decay), 4, 10–11, 55, 62, 75–77, 127, 307, 318, 320, 322, 554–564, 571, 575, 581–584, 588–589, 665, 842
- Brevineura*, 1, 7–8, 10–11  
*ploratula*, 2  
*xanthochypeata*, 2
- Breviostres, 390
- Briggs, John C., Fishes and birds: Gondwana life rafts reconsidered, 548–553
- Britton, Tom, *see* Erixon, Per, 665–674
- Brownian motion parameter, 714
- Brown, Rafe M., *see* Evans, Ben J., 794–823
- Bryant, David, *see* François-Joseph Lapointe, 865–868
- Bufo valliceps*, 287
- Bungarus*, 451  
*fasciatus*, 440
- Bull, Nicholas J., *see* Schwarz, Michael P., 1–14
- Burn-in trees, 607
- Butterflies, 794  
 nymphalid, 28  
 swallowtail, 589
- Caenogastropod, 620, 623
- Caenophidia, 439–459
- Caiman*, 391, 396, 415  
*crocodilus*, 405, 412, 417  
*latirostris*, 405  
*yocare*, 388
- Caimanae, 409
- Cairina moschata*,
- Calamariinae, 440, 457
- Calcarea, 311–333
- Calcaronea, 311, 313–315, 318, 320, 322–325, 328–329
- Calcinea, 311, 313–315, 318, 320, 322–325, 328–329
- Calcispongia, 311–333
- Callilictus, 24
- Callimico*, 740, 742  
*goeldii*, 736
- Calliopheinae, 443
- Callithrix*, 706, 740, 742  
*geoffroyi*, 736  
*jacchus*, 736, 738
- Callitrichinae, 740, 742
- Calloselasma*, 447, 451  
*rhodostoma*, 441
- Calyptraea*, 618–640  
*aspersa*, 638  
 cf. *conica*, 638  
 cf. *lichen*, 638

- chinensis*, 623, 638  
*fastigata*, 638  
*manillaris*, 638  
 Calyptraeid, 620, 629, 631–633  
   biogeography, 631  
   evolution, 632  
   gastropods, 618–619  
   larvae, 631  
   taxonomy, 619  
 Calyptraeidae, 618–619, 623, 632  
 Camels, 20, 221, 857  
 Camin–Sokal parsimony, 444, 446  
 Campbell, Christopher S., *see* Smedmark, Jenny E. E., 374–385  
 Campbell, Nick, J. H., *see* Murrell, Anna, 296–310  
 Canary, 389  
 Canidae, 846  
 Canids, 707–708  
*Canis*, 706  
 Cannatella, David C., *see* Evans, Ben J., 794–823  
 Canonical  
   correspondence analysis (CCA), 687–689, 693  
   ordination (CO), 687, 693  
   phylogenetic ordination (CPO), 684, 687–689, 691–694  
   tree, 113, 115  
   variate analysis (CVA), 190, 196, 198, 491, 496  
 Canonical phylogenetic ordination, Norberto P. Giannini, 684–695  
*Canthumeryx*, 224  
 Capreolini, 209  
*Capreolus*, 209, 212, 215, 218–219  
   *capreolus*, 210  
 Caprini s.l., 209–210, 215, 225  
 Capulidae, 639  
 Capulids, 620, 623  
*Capulus ungaricus*, 639  
 Carabid beetles, 70, 103  
 Cardillo, Marcel, *see* Bininda-Emonds, Olaf R. P., 724–729  
 Cardini, Andrea, Geometry of the marmot (Rodentia: Sciuridae)  
   mandible: phylogeny and patterns of morphological evolution,  
   186–205  
*Carios capensis*, 300  
 Carnivore supertree, 845  
 Carnivora, 571, 839–851  
*Carollia perspicillata*, 472  
 Cartesian transformation grids (CTGs), 488, 491–492, 497  
 Caryophyllaceae, 820, 832  
 Cassowaries, 550  
*Castor canadensis*, 606  
 Castoridae, 604–606, 608–611, 613–615  
*Casuarius*, 389  
   *casuarius*, 388  
 Catarrhini, 738  
 Catonotus, 492–493  
 Causinae, 441, 453  
*Causus*, 451  
   *defilippi*, 441  
   *rhombeatus*, 441  
 Cattle, 206  
 CB1, 604, 606–610, 613  
 Cave salamanders, 501  
*Cavia*, 649–664  
   *porcellus*, 649, 656  
 Cenozoic, 206, 631, 746  
 Centipedes, 559  
 Cephalocarida, 557  
 Cephalophini, 209–210  
*Cephalophus*, 209, 212, 215, 221  
   *dorsalis*, 210  
   *maxwelli*, 210  
 Cerataphidini, 137, 139  
 Ceratina, 8  
   *japonica*, 2, 5  
 Ceratinini, 1, 2, 9  
*Cercomegistus* sp., 300  
*Cercopithecus*  
   *hamlyni*, 736  
   *nictitans*, 736  
*Cerberus*, 451  
   *rhynchops*, 440, 446  
*Cermatobius*, 559  
 Cervidae, 206–207, 209–210, 212–213, 215, 217–222, 224  
 Cervinae, 209  
*Cervus*, 207, 209, 212, 215, 218–219  
   *elaphus*, 210  
   *unicolor*, 210  
 Cetacea, 15–22, 209, 221, 724–729, 853–855, 857–858, 860  
 Cetaceans, 853, 860  
   phylogeny, 854  
 Cetartiodactyla, 206, 221  
*Chaetodipus*, 609, 614  
   *californicus*, 606  
*Chalinolobus tuberculatus*, 462  
 Characters, 239–252, 851–852, 864  
   adult, 8–9  
   anatomical, 742  
   autopomorphic, 865  
   binary, 244, 247, 256–257, 335, 535  
   chromatic, 178  
   cladistic, 854  
   coding, 334–351, 401, 405, 540  
   complex, 245  
   constant, 378  
   construction, 239–241, 243, 246, 253  
   convergent, 502, 510  
   correlation, 131–158  
   cranial, 187  
   cytological, 311, 313, 326–328  
   dental, 738, 853, 857, 860  
   diagnostic, 323, 328, 545  
   discrete, 136, 825  
   distribution, 264–265  
   DNA, 56, 348, 405, 509  
   embryological, 311, 313, 327–328  
   equally weighted, 318, 327, 358  
   evolution, 56, 152, 263, 318, 328, 364, 416, 543, 647, 833  
   foot, 858  
   fruit, 374–375  
   gap, 317–318  
   genitalic, 8, 91  
   homoplastic, 589, 767  
   indel, 389, 823, 826, 829  
   informative, 16, 378, 575, 583  
   larval, 8–9, 92  
   life-history, 9  
   mandibular, 192  
   mapping, 27, 131–158  
   meristic, 506, 513  
   molecular, 55, 70, 76–77, 131, 199, 209, 296, 298, 409, 738, 742  
   morphological, 55, 57, 70, 72, 74, 87–88, 89, 91, 131–132, 135, 142,  
   178, 181, 199, 209, 213, 217, 219, 298, 313–314, 317, 323, 327–328,  
   340, 389–390, 400, 406–407, 409, 412, 420, 439, 442, 457, 474,  
   501–503, 506, 509–510, 537, 539–543, 545, 559, 572, 604, 632, 738,  
   742, 748, 760, 855–857

- multistate, 26, 75, 239, 255–257, 335  
 osteological, 187, 760  
 parasitological, 738, 742  
 parsimony-informative, 4, 298, 323, 345, 446, 451, 529, 531, 773  
 phylogenetically informative, 55–56, 826  
 polymorphic, 505, 833  
 primary, 725–726  
 pupal, 8  
 reductive, 245  
 reweighted, 318, 327, 371  
 shell, 619, 623  
 skeletal, 197, 199, 222, 313, 403  
 snout, 416, 621–622  
 state, 87, 132, 149, 239, 245–246, 250, 253, 296, 309–310, 352, 354, 357, 400, 405, 427, 502–503, 505, 542, 760, 831, 835  
 summary, 337, 342  
 systematic, 243  
 two-state, 236  
 unambiguous, 539, 557  
 uninformative, 76, 217, 575, 581, 826  
 vertebral, 439  
*Charadrius semipalmatus*, 286  
*Cheilea*, 632, 639  
   *equestris*, 639  
 Cheirogaleidae, 711–713  
*Cheirogaleus*, 706  
 Chelicerata, 56, 296, 557  
 Chevrotains, 206  
   lesser Malay, 210  
 Chicken, 388–389, 391, 551  
*Chilalictus*, 24  
 Chilopoda, 557  
*Chimeromyia*, 749  
 Chimpanzee, 52–53, 711–713, 715  
*Chinchilla laniger*, 606  
 Chinchillidae, 606  
 Chinese  
   muntjak, 210  
   water deer, 210, 220  
 Chipmunks, 194, 197  
 Chippindale, Paul T., *see* Wiens, John J., 501–514  
 Chironomidae, 430  
 Chi-square tests, 307, 395, 397–398, 607  
 Chloroplast  
   DNA, 374–375, 382  
   genome, 336  
   phylogeny, 375  
 Choanoflagellata, 316–317  
*Chordeiles acutipennis*, 286  
 Chromatic characters, 178  
 Chromatograms, 94  
*Chrysops carbonarius*, 756  
 Cichlidae, 549, 552  
 Cichlid fish, 549–553  
*Ciconia nigra*, 286  
*Cirripathes*, 317  
   *lutkeni*, 316  
 Cirripectida, 557  
 Clades, 11, 15–17, 19–20, 23, 34, 55, 62, 70, 76–77, 79, 81, 100–101, 103, 105–106, 119, 122, 125, 140, 159, 165–167, 172, 178–179, 186–187, 220, 241, 249, 275, 278, 304–305, 318, 320, 323–324, 327, 329, 334, 344, 374–375, 377, 379, 383–384, 390, 403, 409, 439, 445–447, 452, 455, 463, 468, 494, 503, 508, 511, 529–531, 535, 542, 557, 560–561, 581, 583, 585, 590, 604, 614, 618, 623, 629, 631–632, 665, 667–669, 671–672, 688, 697, 711–712, 724, 749, 761–762, 767, 771, 776, 797, 802, 804, 807, 810–811, 827, 829, 832, 839–840, 843–847  
   phylogenetic, 714  
 Cladistic  
   analysis, 8, 81, 253, 403, 541, 572, 738  
   characters, 854  
   information content (CIC), 241  
   hypothesis, 92  
   relationship, 70–71  
   parsimony, 356, 362, 365  
 Cladistics, 63, 70–88, 520  
   molecular, 187  
 Cladogenesis, 641–642, 644–645, 647, 746, 757, 761, 834  
 Cladogenetic model, 641  
 Cladogram, 5, 70, 73, 76–77, 79, 81, 83–84, 195, 255–258, 272, 359, 362, 406–407, 520, 525–526, 548–549, 684, 722, 742, 802  
   coding, 255–259  
   molecular, 187, 742  
*Claravis pretiosa*, 38  
 Clarifying Aetosaur phylogeny requires more fossils, not more trees—reply to Intraorganismal homology, character construction, and the phylogeny of Aetosaurian Archosaurs (Reptilia, Diapsida), Andrew B. Heckert and Spencer G. Lucas, 253–254  
*Clarkia*, 347  
*Clathrina*, 314–315, 320, 329, 332–333  
   *cerebrum*, 316  
   *clathrus*, 329  
 Clathrinida, 314, 318  
 Clathrinidae, 314  
 Clayton, Dale H., *see* Johnson, Kevin P., 37–47  
*Climacoceras*, 224  
 Clocklike trees, 233  
 Clock model (*see* molecular clock)  
 Cluster analysis, 194, 205, 497, 722  
*C-mos*, 758, 762, 764  
*C-myc*, 386–402  
 Cnidaria, 311, 316–317, 320, 430, 520  
*Coahomasuchus*, 241, 243, 250–251, 254  
 Coding, 239–252, 851–852  
   cladograms, 255–259  
   indels, 444, 575  
 Codons/codon positions, 3, 5, 7, 10, 20, 28, 391  
 Cody, Jeannine H., *see* Rodman, James E., 428–435  
 Coelenterates, 518  
 Coenagrionidae, 89, 91–92  
*Coenomyia ferruginea*, 756  
 Coevolution, 37–47  
 Coleoptera, 430  
 Collin, Rachel, Phylogenetic relationships among Calyptraeid gastropods and their implications for the biogeography of marine speciation, 618–640  
 Colonization, 70–88  
*Coluber*, 451  
   *constrictor*, 440  
 Colubridae, 440, 456  
 Colubrid snakes, 758  
 Colubrinae, 439–440, 447, 452, 455, 457  
 Colubrini, 457  
 Colubroidea, 439–459  
*Columba*  
   *guinea*, 38  
   *livia*, 38, 286  
*Columbicola*, 37–39, 41–42, 45  
   *adamsi*, 38  
   *bacillus*, 38  
   *baculoides*, 38  
   *columbae* 1, 38

- columbae* 2, 38, 42  
*exilicornis*, 38  
*extinctus*, 38, 42  
*gracilicapitis*, 38, 42  
*gymnopelidae*, 38  
*macrourae* 1, 38, 46  
*macrourae* 4, 38  
*macrourae* 5, 38  
n. sp., 38  
*passerinae* 1, 38, 42  
*passerinae* 2, 38  
*theresae*, 38, 46  
*timmermanni*, 38  
*veigasimoni*, 38  
*xavieri*, 38  
Columbiformes, 37–47  
Columbina, 46  
  *inca*, 38, 46  
  *passerina*, 38, 46  
Coluria, 374, 381–383  
  *geoides*, 374, 376, 381–382  
Coluridae, 374, 377–378, 382  
Combinatorics of tandem duplication trees, Olivier Gascuel, Michael D. Hendy, Alain Jean-Marie, and Robert McLachlan, 110–118  
Combined data, 55–65  
  analysis, 96  
  evidence, 403–422  
  tree, 612  
Combined support for wholesale taxic atavism in gavialine  
  Crocodylians, John Gatesy, George Amato, Mark Norell, Rob DeSalle, and Cheryl Hayashi, 403–422  
Combining data, 528–538  
Comparative  
  biology, 55–65  
  method, 23–36  
Comparing bootstrap and posterior probability values in the four–taxon case, Michael P. Cummings, Scott A. Handley, Daniel S. Myers, David L. Reed, Antonis Rokas, and Katarina Winka, 477–487  
Comparison of likelihood and Bayesian methods for estimating divergence times using multiple gene loci and calibration points, with application to a radiation of cute-looking mouse lemur species, Ziheng Yang and Anne D. Yoder, 705–716  
Complex characters, 245  
Component coding, three-item coding, and consensus methods, David M. Williams and Christopher J. Humphries, 255–258  
*Compsomelissa*, 1–2, 4–5, 7–12  
  *borneri*, 2  
Computer simulation (*see also* simulation and Monte Carlo simulation), 528–538, 696–704  
Computing the uniform component of shape variation, F. James Rohlf and Fred Bookstein, 66–69  
Conflict, 839–851  
Congruence, 37, 55–65, 193, 329, 539–548, 555, 607, 613, 669, 717, 865–868  
Conifers, 784  
Consensus, 255–259, 849–851  
  efficiency (CE), 241  
  trees, 55, 128, 140, 241, 251, 255, 258, 344, 450, 531, 850, 855, 865–868  
Consistency index, 3, 5–6, 10, 28, 76, 240, 247–248, 252, 304, 339, 345–346, 348, 392, 396, 577, 581–583, 762, 764, 826  
Constrained tree, 16–18, 20, 22, 407, 761, 807, 847  
Continuous  
  jackknife function analysis (CJF), 55–58, 61–63  
  time Markov model, 131–134, 147, 149, 651  
  time Markov process, 179, 644  
Control region (CR), 460–476  
*Conus*, 619  
Convergence, 501–514, 614  
  sciurid, 185–205  
Convergent  
  characters, 502, 510  
  evolution, 296, 497  
Conway, Lindsay, *see* Danforth, Bryan N., 23–36  
Co-occurrence, 271–280  
Cooper, Steven J. B., *see* Schwarz, Michael P., 1–14  
Copath  
  analysis, 41  
  tree, 45  
Cophylogenetic analysis, 737  
Cophylogeny, 735–744  
*Coracias caudata*, 286  
*Coragyps atratus*, 388  
Corbiculate bees, 23, 33  
Correspondence analysis, 687  
Corroboration, 352–367  
*Cosmiomma*, 305–306  
Cospeciation, 37–47  
*Coturnix pectoralis*, 286  
Cows, 210  
Crangonyctidae, 430  
Cranial characters, 187  
Credibility regions (CR), 390, 394  
*Crepidula*, 618–640  
  *aculeata*, 636  
  *adunca*, 637  
  aff. *depressa*, 636  
  aff. *marginalis*, 637  
  aff. *onyx*, 638  
  aff. *williamsi*, 637  
  *arenata*, 637  
  *argentina*, 636  
  *atrasolea*, 636  
  *cerithicola*, 637  
  cf. *aculeata* Cape Verde, 623, 636  
  cf. *aplysioides*, 637  
  cf. *incurva*, 637  
  cf. *nivea*, 637  
  cf. *onyx*, 638  
  cf. *perforans*, 637  
  *complenata*, 629, 631, 637  
  *convexa*, 629, 637  
  *coquimbensis*, 636  
  *costata*, 636  
  dd. *onyx*, 638  
  *depressa*, 636  
  *excavata* Mexico, 620, 632, 637  
  *excavata* Peru, 620, 637  
  *fimbriata*, 636  
  *fornicata*, 619, 632, 637  
  *gibbosa*, 637  
  *grandis*, 632, 637  
  *gravispinosa*, 636  
  *immersa*, 636  
  *incurva*, 632, 637  
  *lessoni*, 636–637  
  *maculosa*, 638  
  *marginalis*, 638  
  *monoxyla*, 636  
  *naticarum*, 638  
  *navicula*, 638



- norrisarum*, 638  
 n. sp., 638  
 n. sp. dd., 638  
 n. sp. pt., 638  
*nummaria*, 637  
*onyx*, 619, 631, 638  
*perforans*, 637  
*philippiana*, 623, 637  
*plana*, 637  
*porcellana*, 629, 638  
*protea*, 637  
 s.l., 637  
 s.s., 623, 631–632, 636  
*striolata*, 637  
*unguiformis*, 637  
*ustulatulina*, 638  
*williamsi*, 623, 637  
*Crepipatella*, 623, 631, 636  
*capensis*, 631–632, 636  
*dilatata*, 632, 636  
*fecunda*, 632, 636  
*lingulata*, 636  
 n. sp., 636  
 Cretaceous, 23, 33, 403, 419, 550–552, 631, 746, 753, 861  
 early-, 548  
 mid-, 549, 552  
 late-, 419, 549–552, 753  
 upper-, 753  
*Cretaformia*, 749  
 Crickets, 70, 833  
 Crocodile, 285  
   African slender-snouted, 388  
 Crocodylians, 240, 283, 286, 293, 389, 403  
 Crocodylia, 386–402, 403–422  
 Crocodyliformes, 386, 415  
 Crocodylidae, 386, 392, 394  
 Crocodylinae, 403, 405, 408–409, 412, 415, 417, 419  
 Crocodyloidea, 391  
*Crocodylus*, 386, 391, 396  
   *cataphractus*, 388, 391, 405, 408–409, 415, 417  
   *intermedius*, 405, 408, 417  
   New World, 409  
   *niloticus*, 285  
   *rhombifer*, 405, 408  
 Crotalinae, 441, 447, 453  
*Crotalus*, 447, 451  
   *horridus*, 441  
   *viridis*, 441  
*Crotaphopeltis*, 447, 451, 457  
   *hotamboeia*, 440  
*Crucibulum*, 618–640  
   *auricula*, 638  
   cf. *personatum*, 638  
   cf. *serrata*, 638  
   *concamaratum*, 623, 638  
   *lignarum*, 638  
   *radiata*, 638  
   *scutellatum*, 638  
   *spinosum*, 638  
   *tenuis*, 638  
*Crunomys*, 812  
 Crustacea, 430, 432, 557  
*Crystallaria*, 496–498  
   *asprella*, 491, 496–499  
 Ctenodactylidae, 605–606  
 Ctenohystric, 605, 615  
*Ctenonomia*, 24  
 Ctenophora, 311, 316–318, 320, 327–328  
*Cuculus pallidus*, 286  
*Culex pipiens*, 745  
 Cumaceans, 430  
 Cummings, Michael P., Scott A. Handley, Daniel S. Myers, David L. Reed, Antonis Rokas, and Katarina Winka, Comparing bootstrap and posterior probability values in the four-taxon case, 477–487  
 Culicomorpha, 754  
 CXCR4/CCR5 coreceptor, 649–664  
 Cycads, 784  
*Cyanoramphus*, 471  
*Cyclorrhapha*, 746, 749–751, 753  
*Cymatium parthenopeum*, 640  
*Cynomys*, 189, 194  
   *leucurus*, 204  
   *ludovicianus*, 189, 204  
*Cypraea spurca*, 640  
 Cyprinodontiformes, 548–459  
*Cypripedium*, 346  
 Cytogenetic analysis, 374  
*Cytochrome b*, 2–5, 7–8, 10–11, 16–18, 20, 22, 39, 41–42, 161, 163–166, 171, 179, 181, 186, 193, 195, 198–199, 206–207, 209–212, 215, 297, 443, 445–447, 451, 455, 471–472, 488, 504, 508, 571–593, 605, 657, 659, 677, 680–681, 705–706, 709, 727, 861  
 Cytochrome oxidase I (COI), 1–5, 7–8, 10–11, 23, 26–30, 32, 37, 39, 41–42, 45, 72–73, 139, 297–298, 557, 559, 618–640, 657–659, 674  
 Cytochrome P-450, 206, 209–212, 219  
 Cytochrome oxidase II, 33, 94, 95, 139, 207, 705–706, 709  
 Cytological characters, 311, 313, 326–328  
  
*Dactylanthus taylorii*, 473  
*Dalloapula*, 9  
*Damaliscus*, 209, 212, 215, 218  
   *pygargus*, 210  
 Damsel flies, 70, 833  
   *Megalagrion*, 89–109, 833  
 Danforth, Bryan N., Lindsay Conway, and Shuqing Ji, Phylogeny of eusocial *Lasioglossum* reveals multiple losses of eusociality within a primitively eusocial clade of bees (Hymenoptera: Halictidae), 23–36  
 Darters, 488–489, 494, 498  
*Dasypeltis*, 447, 451, 457  
   *medici*, 440  
   *scabra*, 440, 459  
 Data  
   combination, 439–459  
   conflict, 386–402  
   non-independence, 724–729  
   partitions, 386–402  
   visualization, 55–65  
*Daubentonia*, 706, 712  
 Dayrat, Benoît, Roots of phylogeny: how did Haeckel build his trees?, 515–527  
 DeBry, Ronald W., Identifying conflicting signal in a multigene analysis reveals a highly resolved tree: the phylogeny of Rodentia (Mammalia), 604–617  
 Decay  
   analysis (see also Bremer support), 12, 128, 243, 407  
   index, 128, 336, 377, 381, 842  
 Decision theory, 674–683  
 Deduction, 259–271  
 Deep sea mollusks, 430  
 Deer,  
   black-tailed, 210

- Chinese water, 210  
 European roe, 210  
 mouse, 206, 854, 857  
 musk, 206–207, 210, 219–220  
 red, 210  
 Dei-Cas, Eduardo, *see* Hugot, Jean-Pierre, 735–744  
 Deletion (*see* indel)  
 Delma, 757–758, 762, 764, 767, 770–771, 773, 775, 777–778  
   (*Aclys*) *concinna*, 759, 762, 764, 770, 775, 777–778  
   *australis*, 759, 775, 778  
   *borea*, 759, 775, 778  
   *borea haroldi*, 759  
   *butleri*, 759, 770, 778  
   *elegans*, 758, 775  
   *fraseri*, 757–759, 762, 775–778  
   *fraseri fraseri*, 762, 775–776  
   *fraseri petersoni*, 762, 775–776  
   *grayii*, 757, 759, 762, 775–778  
   *impar*, 759, 775, 778  
   *inornata*, 759  
   *labialis*, 759, 764, 770, 775, 777–778  
   *mitella*, 759, 762, 770  
   *molleri*, 759, 775, 778  
   *nasuta*, 759, 778  
   *pax*, 759, 762, 775  
   *petersoni*, 757, 759, 777  
   *plebeia*, 758, 775  
   *tincta*, 759, 775, 778  
   *torquata*, 759, 775, 778  
 Demanche, Christine, *see* Hugot, Jean-Pierre, 735–744  
 Demospongiae, 311, 314, 316–317, 320, 328–330  
 Dendrelaphis, 447, 451, 457  
   *calligastrea*, 440  
   *pictus*, 440  
 Dendroaspis, 447, 451, 456  
   *polylepis*, 441  
   sp., 441  
 Dendrogram, 192–193, 195, 199  
   mandibular, 195, 197  
   UPGMA, 193  
 Dendroica, 776  
 Dental characters, 738, 853, 857, 860  
 Dentition, 16  
 Dermacentor, 299, 305–306, 310  
   *andersoni*, 299  
   *marginatus*, 299  
   *reticulatus*, 299  
   s.l., 299, 305  
   *variabilis*, 299  
 DeSalle, Rob, *see* Gatesy, John, 403–422  
 Desmotosuchus, 241–243, 248–252, 254  
   *haplocerus*, 254  
 de Queiroz, Kevin and Steven Poe, Failed refutations: further  
   comments on parsimony and likelihood methods and their  
   relationship to Popper's degree of corroboration, 352–367  
 DHPS, 735–738, 740, 742  
 Diacodexis, 858  
 Diagnostic characters, 323, 328, 545  
 Dialictus, 24, 28, 32–33  
 Diaphanoeca grandis, 316  
 Diapsida, 239, 253  
 Dicotyledons, 524  
 Dicrocerus, 224  
 Didelphis, 706, 708  
   *virginiana*, 285, 709  
 Diesmos, Arvin, *see* Evans, Ben J., 794–823  
 Dinosauria, 839  
 Dinosaurs, 253  
   *Diospyros sandwichensis*, 820  
   *Dipodomys*, 614  
     *spectabilis*, 606  
   *Dipsas*, 447, 451  
   *Dinodon*, 447, 451  
     *semicarinatum*, 440, 445  
   *Diogmites* sp., 756  
   Diphyllidae, 430  
   Diplodactyline geckos, 758, 760  
   *Diplodactylus*, 757  
     *damaeus*, 758–759  
     *tessellatus*, 758–759  
 Dipodidae, 604–606, 608, 613–614  
   *Dipsas catesbyi*, 441  
 Diptera, 430, 557, 745–756  
   *Dipus*, 614  
     *sagitta*, 606  
 Dirichlet  
   density, 711  
   distribution, 607, 652, 655, 749  
 Discete characters, 136, 825  
 Discrete-gamma  
   distribution (*see also* gamma distribution), 165, 445, 666, 698, 700,  
     703  
   estimate (DGE), 595–596, 599–601  
   probability estimate (DGPE), 596–602  
 Dispersal, 549–553, 794–819  
 Distance analysis, 334, 343  
 Divergence time, 705–716, 745–756  
 DNA, 2–3, 74, 94, 110, 166, 212, 221, 298, 306, 334, 340, 342, 345, 370,  
   382, 389, 391, 408–409, 419, 506, 509, 551–552, 606, 620, 725, 727,  
   760, 857  
   analysis, 551  
   avian, 389  
   characters, 56, 348, 405, 509  
   chloroplast, 374–375, 382  
   evolution, 443  
   extraction, 26, 38, 462, 736  
   fingerprints, 404  
   genomic, 161, 315–316, 443, 550, 566, 574, 606, 758, 823  
   hybridization, 550–551, 573  
   isolation, 375  
   mitochondrial, 3–4, 7, 12, 37, 48, 52, 89, 94–101, 103, 159–185, 296,  
     386–387, 395, 407–408, 415, 418, 423, 439–459, 460–461, 464, 471,  
     474, 503–504, 506, 508–509, 548, 551, 571–572, 583, 586, 589, 656,  
     674, 677, 680–681, 735, 757–758, 760–762, 764, 767, 770–771, 773,  
     775–776, 794, 798, 801, 808, 810–812  
   nuclear, 37, 89, 95, 99, 103, 221, 374–375, 382–383, 407–408, 415, 418,  
     423, 509, 571–593, 735, 757–758, 760–762, 764, 767, 770–771, 773,  
     775–776  
   plasmid, 316  
   *Pneumocystis*, 735  
   polymerase, 606  
   sequence, 38–39, 49, 79, 133, 135, 140, 159, 209, 296, 298, 304,  
     334–336, 339–340, 344, 346, 348, 387, 396, 400, 404–405, 418–419,  
     477, 479, 488, 571, 574, 604, 619, 621, 623, 632, 651, 666, 735, 823,  
     857  
   sequence data, 23, 509, 530–531, 539, 542, 545, 674, 708, 758, 773, 849  
   substitution, 135, 140, 575, 644, 647, 824  
   substitution model, 444  
   tree, 770, 773, 775  
 Dog, 591, 711–713  
 Dolichopodidae, 756  
 Dollosuchus, 416

- Dolphins, 501
- Donnellan, Stephen, *see* Jennings, W. Bryan, 757–780
- Douzery, Emmanuel J. P., *see* Hassanin, Alexandre, 206–228
- Doves, 37, 41, 45  
New World ground, 39
- Draco*, 810
- Dremotherium*, 224
- Dromaius novaehollandiae*, 286
- Drosophila*, 2, 89, 383, 557, 745–746, 751, 753–754, 833  
*melanogaster*, 94, 745, 756  
*yakuba*, 94, 298
- Drosophilidae, 756
- Drosophilid flies, 70
- Dryadeae, 374
- Dryomys nitedula*, 606
- Dwarf caiman, 388
- Echinodermata, 296, 520
- Echinometra* sea urchins, 631
- Echmoidea, 288
- Echthralictus*, 24
- Ecology, 430, 515, 633, 684
- Ecomorphology, 498, 684–695
- EF-1 $\alpha$ , 2–4, 8, 10–11, 23, 26–30, 32, 39, 41–42, 94–99, 101–102, 557, 596, 598, 677, 680
- Effect of phylogeny on interspecific body shape variation in darters (Pisces: Percidae), J. Michael Guill, David C. Heins, and Craig S. Hood, 488–500
- $\epsilon$ -globulin, 738
- Eichhornia*,  
*azurea*, 154, 156  
*crassipes*, 154, 156  
*diversifolia*, 154, 156  
*heterosperma*, 154, 156  
*meyeri*, 154, 156  
*paniculata*, 154, 156  
*paradoxa*, 154, 156  
sp., 154, 156
- Eigenvectors, 69, 694
- Eigenvalues, 67
- Eira*, 577, 581, 590  
*barbara*, 573, 581
- Elaphe*, 451  
*flavolineata*, 440  
*obsoleta*, 440
- Elapidae, 439, 441, 443, 447, 455–456
- Elapinae, 441, 447
- Elapsoidea, 451  
*nigra*, 441
- Elephants, 794  
African, 591
- Ellipsoptera, 776
- Embriological characters, 311, 313, 327–328
- Empididae, 754
- Empidoidea, 746, 751
- Empis*, 754
- Emu, 550–551
- Enallagma*, 94  
*geminatum*, 94
- Endemism, area of, 271–280, 717–723
- Enhydra*, 590  
*lutris*, 573, 583, 590
- Enhydris*, 446, 451  
*enhydris*, 440  
*plumbea*, 440
- Eocene, 222, 224, 403, 419, 857–858
- early-, 795
- late-, 222, 224
- mid-, 218, 222, 224, 550
- Eoconodon*, 858
- Eogavialis*, 401
- Eotragus*, 225
- Ephemeroptera, 106
- Ephydatia muelleri*, 316
- Equal-rates Markov (ERM), 229–238  
model, 57  
trees, 233
- Equally  
parsimonious tree, 528, 530  
weighted character, 318, 327, 358  
weighted parsimony, 620–621  
weighted tree, 211
- Equus*, 706, 857
- Eremoneura, 746, 750–751, 754
- Erethizon dorsatum*, 606
- Erethizontidae, 606
- Eriksson, Torsten, *see* Smedmark, Jenny E. E., 374–385
- Erixon, Per, Bodil Svennblad, Tom Britton, and Bengt Oxelman, Reliability of Bayesian posterior possibilities and bootstrap frequencies in phylogenetics, 665–673
- Ermine, 573
- Erythrocoma*, 374  
*triflora*, 374, 376, 379, 383
- Esastigmatobius*, 559
- Escherichia*, 660  
*coli*, 209, 383, 659
- Estimation of rates-across-sites distributions in phylogenetic substitution models, Edward Susko, Chris Field, Christian Blouin, and Andrew J. Roger, 594–603
- Etheostoma*  
*blennioides*, 497, 500  
*blennius*, 491, 500  
*caeruleum*, 498, 500  
*coosae*, 492, 500  
*crossopterum*, 491, 500  
*exile*, 498, 500  
*flabellare*, 500  
*fusiforme*, 498, 500  
*inscriptum*, 497, 500  
*jordani*, 492, 498, 500  
*juliae*, 491–492, 498  
*lynceum*, 494, 497, 500  
*nigrum*, 494, 497–498, 500  
*olmstedii*, 491–492, 494, 500  
*proeliare*, 491, 500  
*punctulatum*, 500  
*radiosum*, 493–494  
*simoterum atripinne*, 492, 494  
*simoterum simoterum*, 492, 494  
s.l., 491, 497, 500  
*spectabile*, 500  
s.s., 492–493, 500  
*stigmaeum*, 497–498, 500  
*whipplei*, 491, 493–494, 498, 500  
*zonale*, 491, 494, 500
- Etheostomatinae, 488
- Eubacteria, 659
- Eucalyptus trees, 777
- Euclidean  
distances, 67, 337, 676  
geometry, 67  
space, 66–67

- Euconolylops*, 8–9  
*Eugeum*, 383  
*Eulemur*, 706  
   *macaco*, 736  
*Eulonchus* sp., 756  
*Eumeryx*, 224  
 Eumetazoa, 311, 318, 327, 330  
 Eumycota, 316–317  
*Eurycea*, 501–514  
   *bislineata*, 505  
   *chisholmensis*, 505, 513  
   *latitans*, 504–506, 509, 513  
   *longicauda*, 505  
   *multiplicata*, 504–505, 513  
   *nana*, 505, 509, 513  
   *naufragia*, 504–506, 513  
   *neotenes*, 505, 509, 513  
   *pterophila*, 504–505, 509, 513  
   *quadridigitata*, 505  
   *rathbuni*, 501, 504–506, 508–510, 513–514  
   *robusta*, 504, 509  
   *sosorum*, 505, 509, 513  
   sp., 509, 513  
   *tonkwae*, 504–505, 513  
   *tridentifera*, 501, 504–506, 508–510, 513–514  
   *trogodytes*, 504–505, 508–509, 513  
   *wallacei*, 505, 509,  
   *waterlooensis*, 504, 509  
   *wilderae*, 505  
 European roe deer, 210  
 Eusocial evolution, 23  
 Eusociality, 12–13, 23–36  
*Eutamias*, 205  
   *sibiricus*, 189, 205  
 Eutherian mammals, 249, 585, 860  
*Euthocodon arambourgi*, 417  
 Euthyneura, 328  
 Evans, Ben J., Rafe M. Brown, Jimmy A. McGuire, Jatna Supriatna,  
   Noviar Andayani, Arvin Diesmos, Djoko Iskandar, Don J.  
   Melnick, and David C. Cannatella, Phylogenetics of fanged  
   frogs: testing biogeographical hypotheses at the interface of  
   the Asian and Australian faunal zones, 794–823  
 Evans, Rodger C., *see* Smedmark, Jenny E. E., 374–385  
 Even-toed ungulates, 724  
 Evolution, 1–2, 12, 20, 28, 62, 89, 92, 101–103, 126, 149, 165, 233,  
   239–252, 254, 296–310, 311–333, 349, 368, 374, 377, 383, 451, 511,  
   515–527, 549, 551, 573, 576, 645, 658, 660, 725, 735, 740, 851–852  
   calyptraeid, 632  
   character, 152, 263, 318, 328, 364, 416, 543, 647, 833  
   convergent, 296, 497  
   DNA, 443  
   eusocial, 23  
   HIV, 649–664  
   island, 820–841  
   mammalian, 206  
   minimum, 121, 287, 478, 489, 579–580  
   molecular, 38, 41, 591, 594–603  
   morphological, 186–205, 404, 542  
   parallel, 296, 307  
   protein, 602  
   punctuational, 831  
   rate of, 602, 641, 646–647, 677, 746, 833  
   reticulate, 374–385  
   social, 1–14, 23–36  
 Evolution of the strategy of long-branch subdivision to improve the  
   accuracy of phylogenetic methods, Steven Poe, 423–427  
 Evolutionary  
   biology, 501–502, 515, 565  
   branches, 849  
   characters, 404  
   character transformation, 354  
   convergence, 853  
   divergence, 119, 572  
   ethnology, 684  
   history, 197, 328, 417, 423, 474, 518, 526, 861  
   hypotheses, 159  
   model, 126, 352, 364, 377, 615, 665, 668, 672, 692, 696–697, 705, 727,  
     781–782, 788, 791–792, 801, 829, 850  
   pattern, 852  
   plasticity, 329  
   processes, 89, 211, 861  
   radiations, 70, 89, 207  
   rate, 218, 287, 396–397, 401, 700, 705–716, 748, 753  
   studies, 727  
   theory, 264–265, 515, 524–525  
   trees, 526, 602  
 Evylaeus, 24, 32–33  
*Exoneura*, 1, 12  
   *angophorae*, 2  
   *robusta*, 2  
*Exoneurella*, 1, 7–8, 10–11, 32  
   *eremophila*, 32  
   *setosa*, 2, 32  
   *tridentata*, 2  
 Exoneuridia, 2, 10  
 Exoneurines, 1, 9–10  
 Exons, 376, 383, 391–392, 394  
 External transcriber spacer (ETS), 820–841  
 Failed refutations: further comments on parsimony and likelihood  
   methods and their relationship to Popper's degree of  
   corroboration, Kevin de Queiroz and Steven Poe,  
   352–367  
*Fallugia*, 374  
 False discovery rate (FDR), 783, 790  
 Falsification, 259–271  
 Fanged frogs, 794  
*Farancia*, 447, 451, 455  
   *abacura*, 441  
*Farrea occa*, 316  
*Fejervarya*  
   *limnocharis*, 799, 815  
   *vittigera*, 799  
 Felidae, 845–846  
 Felids, 707–708  
*Felis*, 706  
 Felsenstein  
   model, 463, 703, 708–709, 711–715, 748, 850  
   zone, 229, 426, 641–648, 675  
 FES, 574–577, 581, 583  
 FIB7, 39, 41–42  
*Ficus carica*, 349  
 Field, Chris, *see* Susko, Edward, 594–603  
 Filicinae, 524  
 Fin whale, 210  
 Fishes, 286, 491, 524, 619  
   aplocheiloid, 548–553  
   cichlid, 549–553  
   cyprinodontiform, 549  
   euryhaline, 548  
   freshwater, 548–549  
 Fisher, 573

- Fishes and birds: Gondwana life rafts reconsidered, John C. Briggs, 548–553
- Fitch  
 algorithm, 234  
 parsimony, 444, 446
- Fitch–Margoliash methods, 290–291, 293
- Flatworms, 307
- Flies,  
 blow, 745  
 drosophilid, 70  
 flower, 745  
 fruit, 557, 745  
 hippoboscids, 37  
 horse, 745–746  
 house, 745  
 snipe, 745–746  
 soldier, 746  
 stalk-eyed, 32  
 xylophagid, 745
- Flower flies, 745
- Flowers, 336, 341, 343, 346–347, 349, 753
- Flowering plants, 820
- Foot characters, 858
- Fossils, 23, 48, 61, 253–255, 264, 377, 382, 403–422, 521, 524, 528–538, 614, 631, 707, 711, 713, 746–747, 751, 761, 835, 853, 855  
 amber, 746
- Fossombroniinae, 430
- Fossorella* sp., 639
- Four o'clocks, 334–351
- Fractional weighting, 258
- Fragrance, 334–351
- Frequent inconsistency of parsimony under a simple model of cladogenesis, John P. Huelsenbeck and Katherine M. Lander, 641–648
- Frogs, 287, 334, 794  
 fanged, 794
- Fruit, 383  
 characters, 374–375  
 flies, 557, 745
- F*-test, 687
- Fungi, 317, 429–430
- F*-values, 692
- G6PD, 738, 742
- Galago*, 706
- Galbula pastazae*, 286
- Galictis*, 590  
*vittata*, 573–574, 576, 581, 589–590
- Galliformes, 551
- Gallirex porphyreolophus*, 286
- Gallus gallus*, 286, 396, 405, 408
- Gamma  
 correlation, 727  
 distribution (see also discrete-gamma distribution), 4, 42, 50, 95, 135–136, 293, 318, 377, 390, 463, 506, 576, 594–595, 601, 606, 608, 702, 709, 711, 748, 750, 801, 823  
 model, 594–603, 750  
 shape parameter, 621, 711
- $\gamma$ -fibrinogen, 207
- Gammarus minus*, 509
- Gamopetalae, 524
- Gap character, 317–318
- Gascuel, Olivier, Michael D. Hendy, Alain Jean-Marie, and Robert McLachlan, Combinatorics of tandem duplication trees, 110–118
- Gascuel, Olivier, see Guindon, Stéphane, 696–704
- Gastrea, 311
- Gastreae, 520
- Gastropoda, 328
- Gastropods, 619, 631  
 Calyptraeids, 618–619
- Gastropyxis*, 447, 451  
*smaragdina*, 440
- Gatesy, John, George Amato, Mark Norell, Rob DeSalle, and Cheryl Hayashi, Combined support for wholesale taxic atavism in gavialine Crocodylians, 403–422
- Gatesy, John, see O'Leary, Maureen A., 853–866
- Gavial, 403–422
- Gavialidae, 398–399
- Gavialinae, 403, 416–418, 420
- Gavialis*, 386, 388, 391–392, 394, 396–400, 403  
*gangeticus*, 386, 388, 390, 398, 403, 405–406, 408–409, 412, 415–419
- Gavialoidea, 401
- Gavialosuchus*  
*americanus*, 412  
*eggenbergensis*, 417
- Gazella*, 209, 212, 215  
*granti*, 210, 221  
*thomsoni*, 210
- Gazelle, 210
- Geckos, 758  
 diplodactylines, 758, 760
- Geinae, 374–379, 382–384
- Gekkonidae, 757
- Gelocidae, 206
- Genealogical trees, 515, 517, 521, 524, 526
- Generalized least squares, 491
- General-time-reversible (GTR) model, 3–4, 7–8, 18–19, 26, 28–30, 42, 95, 97, 165–166, 212, 286, 318, 390, 392, 396, 445, 463, 576, 579, 585, 608–611, 613, 666–669, 674, 677, 679, 681–682, 737, 762, 784, 801–802, 825, 831, 834
- Genes, 296, 605, 609, 612, 652, 658  
 A2AB, 605, 614–615  
 A6, 674  
*accD*, 336  
 $\alpha$ -lactalbumin, 206, 209–212, 215, 218–220  
 APOB, 574–577, 581, 583  
*atp6*, 657, 659  
*atp8*, 656–659  
 $\beta$ 2-microglobulin, 738  
 $\beta$ -casein, 207  
 $\beta$ -tubulin, 596, 598–600  
 BRCA1, 605, 613–615  
 CB1, 604, 606–619, 613  
 CHRNA1, 574–577, 581, 583  
 cMDH, 596, 598  
*c-mos*, 758, 762, 764  
*c-myc*, 386–402  
 COI, 2–5, 7–8, 10–11, 23, 26–30, 32, 37, 39, 41–42, 45, 72–73, 139, 297–298, 557, 559, 618–640, 674  
 COI-1, 1, 5, 657–659  
 COI-2, 5, 657–659  
 COI-3, 5, 657–659  
 COII, 33, 94, 95, 139, 207  
*Cytochrome b*, 2–5, 7–8, 10–11, 16–18, 20, 22, 39, 41–42, 161, 163–166, 171, 179, 181, 186, 193, 195, 198–199, 206–207, 209–212, 215, 297, 443, 445–447, 451, 455, 471–472, 488, 504, 508, 571–593, 605, 657, 659, 677, 680–681, 705–706, 709, 727  
 cytochrome P-450, 206, 209–212, 215, 219  
 DHPS, 735–738, 740, 742  
 EF1 $\alpha$ , 2–4, 8, 10–11, 23, 26–30, 32, 39, 41–42, 94–99, 101–102, 557, 596, 598, 677, 680

- $\epsilon$ -globulin, 738  
 eRF3, 596, 598  
 FES, 574–577, 581, 583  
 FIB7, 39, 41–42  
 $\gamma$ -fibrogen, 207  
 G6PD, 738, 742  
 GBSSI, 374–385  
 GHR, 605, 613–615  
 H3, 73, 557  
 HBS1, 598  
 HMG-CoA, 596, 598  
 homeobox, 311  
 HSP70, 596, 598, 600  
 HSP90, 598  
 IRBP, 604–614  
 ITS, 73, 76–77, 298, 336, 370–371, 382  
 $\kappa$ -casein, 206–207, 209–212, 215  
 lactoferrin, 206, 209–212, 215, 218, 220  
 mitochondrial, 5–6, 10, 16, 32, 41, 74, 439, 451, 460, 462, 510, 572, 587, 649, 651, 656, 674, 677, 680–681, 725  
 mtLSU-rRNA, 735–738, 740–741  
 mtSSU-rRNA, 735–738, 740  
 NADH, 460  
 ND1, 73–74, 76, 657, 659  
 ND2, 460, 462–468, 471, 657, 659, 758–759, 762, 777  
 ND3, 657, 659  
 ND4, 161, 163–165, 167, 181, 440, 443, 445–447, 451, 453, 455, 657, 659  
 ND4l, 657, 659  
 ND5, 656–657, 659  
 ND6, 406, 657–659  
 ndhF, 140  
 nrDNA, 336  
 nuclear, 16, 28–29, 32, 41, 74, 375, 386, 572  
 opsin, 28–30  
 PcP, 735–744  
*Pneumocystis*, 742  
 protein-coding, 23, 39, 74, 94, 297–298, 307, 358, 396, 405, 445, 460, 471, 506, 604, 609, 612, 656, 682, 705–706  
*psaA*, 785, 787, 791  
*psaB*, 785, 787–788, 791  
 RAG-1, 405, 408  
 RAG-2, 604, 606–610, 613–614  
*rbcl*, 140, 336, 379, 696–704  
 rDNA, 406, 408, 808  
 RHO1, 574–577, 587, 583  
 RNA polymerase II, 557  
 rRNA, 283–284, 297, 307  
 single-copy, 375  
 tree, 63, 179, 193, 258, 374, 446, 583–584, 588, 725, 727, 776  
 tRNA, 2, 52, 94–95, 139, 296–298, 300–301, 303–308, 383, 396, 406, 460, 465–466, 725, 727, 758, 762, 798  
 tRNA<sup>Asp</sup>, 674  
 tRNAL, 73, 76  
*trnL-trnF*, 380–382, 384  
 U2 snRNA, 557  
*v-myc*, 388  
 vWF, 605, 614–615, 738  
 Genes, categories, and species: the evolutionary and cognitive causes of the species problem, Hanno Sandvik (rev.), 565–567  
 Genetalic  
   characters, 8, 91  
   morphology, 71, 82  
 Genetic analysis, 197  
 Genomes, 59, 110, 126, 286, 296, 301, 550, 591, 754  
   chloroplast, 336  
   mitochondrial, 56, 58–59, 238, 296–297, 301, 303, 307, 309, 462–463, 478, 577, 706  
   nuclear, 374–375, 571, 604  
   sequencing, 119, 126  
 Genomic DNA, 161, 315–316, 443, 550, 566, 574, 606, 758, 823  
 Genotypes, 735  
   *Pneumocystis*, 735  
   Geometric morphometrics, 66–69, 186–205, 488–500  
   Geometry of the marmot (Rodentia: Sciuridae) mandible: phylogeny and patterns of morphological evolution, Andrea Cardini, 186–205  
 Geomyidae, 606, 608–609  
 Geomyoidea, 604–605, 608–611, 613–615  
*Geonoma*, 346  
*Geotrygon montana*, 38  
*Geum*, 374–385  
   *andicola*, 374, 381–382  
   *heterocarpum*, 374, 376, 379–384  
   *montanum*, 374, 376, 379, 382–384  
   *reptans*, 374, 376, 383–384  
   *rivale*, 374, 376, 379, 382–384  
   *schofieldii*, 381  
   *urbanum*, 374, 376, 379, 382–384  
   *vernium*, 374, 376, 379, 382–384  
 Gharials, 386, 398–399  
   false, 388  
   true, 388, 396  
 GHR, 605, 613–615  
 Giannini, Norberto P., Canonical phylogenetic ordination, 684–695  
 Gibbon, 52–53  
 Gillespie, Rosemary G., *see* Hormiga, Gustavo, 70–88  
*Ginko*, 784  
*Giraffa*, 207, 209, 212, 218, 221–222, 224  
   *camelopardalis*, 210  
 Giraffes, 206, 210, 269  
 Giraffidae, 206–207, 209–210, 212–213, 218–222  
 Giribet, Gonzalo, Stability in phylogenetic formulations and its relationship to nodal support, 554–564  
 Gittleman, John L., *see* Bininda-Emonds, Olaf R. P., 724–729  
 Gliridae, 604–606, 608–609, 611, 614–615  
 Global clock, 711–712  
*Gloma fuscipennis*, 756  
*Glossalictus*, 24  
 Gnetaleans, 753  
 Gnetales, 781, 784, 787–788  
 Goodness-of-fit test, 464, 471, 674  
 Goose magpie, 388  
 Gorilla, 52–53, 706–708  
 Gower, David J., *see* Harris, Simon R., 239–252, 851–852  
 Gower, David J., *see* Wilkinson, Mark, 127–130  
*Gradicrepidula*, 619, 623, 632  
*Grantia*, 314–315, 320, 322, 332  
   *compressa*, 316, 329  
 Grantiidae, 314, 322–323  
*Grantiopsis*, 314–315, 320, 322, 324, 333  
   sp., 316  
 Granule-bound starch synthase (GBSSI) (*see also* waxy), 374–385  
*Graphiurus murinus*, 606  
*Grayia*, 447, 451, 457  
   *ornata*, 440  
 Greater grison, 573  
 Grenyer, Richard, *see* Bininda-Emonds, Olaf R. P., 724–729  
 Grey-headed chachalaca, 388  
 Ground spiders, 430  
 Ground squirrels, 186, 197

- Grus canadensis*, 286
- Gryposuchus colombianus*, 412
- Guill, J. Michael, David C. Heins, and Craig S. Hood, Effect of phylogeny on interspecific body shape variation in darters (Pisces: Percidae), 488–500
- Guillot, Jacques, *see* Hugot, JeanPierre, 735–744
- Guindon, Stéphane and Olivier Gascuel, Simple, fast, and accurate algorithm to estimate large phylogenies by maximum likelihood, 696–704
- Guinea pig, 656–657, 659
- Gulo*, 577, 581, 590  
*gulo*, 573–574
- Gymnophthalmidae, 689, 691
- Gymnospermae, 518, 524, 781, 787–788
- H3, 73, 557
- Haasiella*, 557
- Habib, Michael, *see* BinindaEmonds, Olaf R. P., 724–729
- Hadropterus*, 491, 493
- Hadziidae, 430
- Haemaphysalinae, 299
- Haemaphysalis*, 299, 304–305, 309–310  
*humerosa*, 299  
*inermis*, 299  
*leporispalustris*, 299  
*longicornis*, 299  
*ssp.*, 310
- Haideotriton*, 505, 509  
*wallacei*, 508
- Handley, Scott A., *see* Cummings, Michael P., 477–487
- Halictus*, 23–24, 32  
*rubicundus*, 33
- Halictidae, 23
- Halictid bees, 23–24, 33
- Halictini, 24
- Haliotis*, 631
- Halterapis*, 1–2, 4–5, 8–10, 12  
*nigrinervis*, 2, 12
- Hapalemur*, 706  
*griseus*, 736
- Haplorhini, 738
- Haplotype, 5, 71, 73, 159–160, 165–166, 171–172, 180–181, 465, 467, 776  
tree, 159, 165–166
- Hard ticks, 296–298, 300–301, 304, 309
- Harris, Simon R., David J. Gower, and Mark Wilkinson, Intraorganismal homology, character construction, and the phylogeny of Aetosaurian Archosaurs (Reptilia, Diapsida), 239–252
- Harris, Simon R., David J. Gower, and Mark Wilkinson, Phylogenetic methods and Aetosaur interrelationships: a rejoinder, 851–852
- Harshman, John, Christopher J. Huddleston, Jonathan P. Bollback, Thomas J. Parsons, and Michael J. Braun, True and false gharials: a nuclear gene phylogeny of Crocodylia, 386–402
- Harvest mouse, 677
- Hasegawa-Kishino-Yano (HKY) model, 4, 7, 49, 52–53, 121, 135, 140, 143, 215, 377, 396, 423, 444, 463–464, 466–468, 471, 506, 508, 577, 614, 681–682, 703, 737, 750, 785, 787
- Hassanin, Alexandre and Emmanuel J. P. Douzery, Molecular and morphological phylogenies of Ruminantia and the alternative position of the Moschidae, 206–228
- Hausdorf, Bernhard and Christian Hennig, Biotic element analysis in biogeography, 717–723
- Hawaii, 70–88, 89–109, 820–841
- Hawkmoths, 349
- Hayashi, Cheryl, *see* Gatesy, John, 403–422
- Heckert, Andrew B. and Spencer G. Lucas, Clarifying Aetosaur phylogeny requires more fossils, not more trees—reply to Intraorganismal homology, character construction, and the phylogeny of Aetosaurian Archosaurs (Reptilia, Diapsida), 253–254
- Heins, David C., *see* Guill, J. Michael, 4880500
- Helicops*, 447, 451  
*angulatus*, 441  
*pictiventris*, 441
- Helminthes, 430, 520
- Hemichordata, 296
- Hemidactyliine salamanders, 509
- Hemihalictus, 23–24, 26, 32–33
- Hemirhagerrhis*, 451  
*nototaenia*, 440  
*viperinus*, 440, 459
- Hempel–Oppenheim model, 260, 263
- Hendy, M. D., *see* Holland, B. R., 229–238
- Hendy, Michael D., *see* Gascuel, Olivier, 110–118
- Henicopidae, 559
- Henicopinae, 559
- Hennig, Christian, *see* Hausdorf, Bernhard, 717–723
- Hennig’s auxiliary principle, 239, 245–246
- Hepaticophyta, 430
- Heptodon*, 857
- Herbivores, 339, 349, 746
- Herpestidae, 846
- Heteranthera*, 154, 156  
*dubia*, 154, 156  
*limosa*, 154, 156  
*oblongifolia*, 154, 156  
*rotundifolia*, 154, 156  
*seubertiana*, 154, 156  
*zosterifolia*, 154, 156
- Heterocoela, 311, 313, 318, 320, 322, 327–328
- Heterodactyla, 746, 750–751, 754
- Heterodon*, 447, 451, 455  
*nasicus*, 441  
*simus*, 441  
*platyrhinos*, 287
- Heterodonta, 561
- Heteromyidae, 606, 608, 614
- Heteropia*, 314–315, 332–333
- Heteroptera, 103
- Heteroptiidae, 314, 322, 324, 329
- Heterotropus senex*, 756
- Heuristic  
parsimony search, 75  
search, 4, 39, 76, 95–96, 166, 318, 327, 336, 368, 372, 377, 504, 575, 607, 609, 611, 621, 666, 737, 823–824, 842, 864  
tree, 607
- Heuristics, 368–373, 696, 782, 841
- Hexactinellida, 311, 314, 316–318, 320, 328, 330
- Hexapoda, 328, 557
- Hierarchical phylogenetic models for analyzing multipartite sequence data, Marc A. Suchard, Christina M. R. Kitchen, Janet S. Sinsheimer, and Robert E. Weiss, 649–664
- Hillis, David M., David D. Pollock, Jimmy A. McGuire, and Derrick J. Zwickl, Is sparse taxon sampling a problem for phylogenetic inference?, 124–126
- Hillis, David M., *see* Wiens, John J., 501–514
- Hippoboscid flies, 37
- Hipponicidae, 639
- Hipponicids, 620, 622, 632  
artiodactylans, 854

- Hipponix*  
 sp. Australia, 639  
 sp. California, 639  
 Hippopotamidae, 209–210, 221, 855  
*Hippopotamus*, 209, 211–213, 215, 222, 706, 712  
*amphibius*, 210  
 Hippos, 207, 210, 707–708, 854–855, 858  
*Hippospongia communis*, 316  
 Hippotragini, 209–210, 215  
*Hippotragus*, 209, 212, 215, 218  
*niger*, 210  
*Hispanomeryx*, 220  
 Historical  
 biogeography, 271–280  
 effects, 684–695  
 HIV, 660, 662, 735  
 evolution, 649–664  
 Hood, Craig S., *see* Guill, J. Michael, 488–500  
 Holarctic rodents, 186  
 Holland, B. R., D. Penny, and M. D. Hendy, Outgroup misplacement and phylogenetic inaccuracy under a molecular clock—a simulation study, 229–238  
 Holothyrina, 300, 309  
*Homalictus*, 24  
 Homalopsinae, 439, 452–453, 455, 457  
 Homeobox gene, 311  
 Hominoid, 711–713  
 Homocoela, 311, 313, 318, 320, 322, 327–328  
 Homogeneous model, 792  
 Homoplastic characters, 589, 767  
 Homoplasy, 16, 30, 55, 57, 61, 152, 154, 156, 211, 230, 239, 243, 245–246, 258, 297, 304, 306–307, 311, 339, 342, 348, 354, 359, 361–362, 398, 403, 415, 420, 442, 444, 460–476, 501–514, 542, 571–572, 575, 577, 581–585, 589, 604, 842, 860–861  
 index, 762, 764  
*Homo*, 706  
*sapiens*, 286, 606, 736  
*Homoroselaps*, 447, 451, 455–456  
*lacteus*, 441  
 Homoscleromorpha, 328  
 Honey bees, 26, 296  
 Honeycreepers, 89  
 Hood, Craig S., *see* Guill, J. Michael, 488–500  
 Hoplitomerycidae, 220–221  
*Hoplitomeryx*, 220–221  
*Hoplobatrachus*  
*occipitalis*, 799, 815  
*rugulosus*, 799, 815  
 Horizontal gene transfer (HGT), 649–664  
 Hormiga, Gustavo, Miquel Arnedo, and Rosemary G. Gillespie, Speciation on a conveyor belt: sequential colonization of the Hawaiian islands by *Orsonwelles* spider (Araneae, Linyphiidae), 70–88  
*Hormiphora* sp., 316–317  
 Horned soldiers, 137, 139–140, 143  
 Horse flies, 745–746  
 Horses, 707–708, 857  
 Horseshoe crab, 300  
 Host  
 phylogeny, 740, 742  
 tree, 737, 740  
 Host–parasite coevolution, 735–744  
 House flies, 745  
 HSP70, 596, 600  
 HSP90, 598  
 Huddleston, Christopher J., *see* Harshman, John, 386–402  
 Huelsenbeck, John P. and Katherine M. Lander, Frequent inconsistency of parsimony under a simple model of cladogenesis, 641–648  
 Huelsenbeck, John P., Rasmus Nielsen, and Jonathan P. Bollback, Stochastic mapping of morphological characters, 131–158  
 Hugall, A. F., *see* Lee, M. S. Y., 15–22  
 Hugot, Jean-Pierre, Christine Demanche, Véronique Barriol, Eduardo Dei-Cas, and Jacques Guillot, Phylogenetic systematics and evolution of primate-derived *Pneumocystis* based on mitochondrial or nuclear DNA sequence comparison, 735–744  
 Human, 52–53, 526, 565, 571, 591, 656707–708, 711–713, 715, 738  
 Humphries, Christopher J., *see* Williams, David M., 255–258  
 Hyaenidae, 846  
*Hyalomma*, 299, 304–305, 310  
*aegyptium*, 299  
*dromedarii*, 299  
*marginatum*, 299  
*truncatum*, 299  
 Hybridization, 63, 89, 92, 103, 379, 383, 820, 832  
*Hydrodynastes*, 447, 451  
*bicinctus*, 441  
 Hydrophiinae, 441, 447  
*Hydrophis*, 447, 451, 456  
*semperi*, 441  
*Hydropotes*, 206, 209, 212, 215, 218–220, 222, 224–225  
*inermis*, 210  
 Hydropotinae, 209  
 Hydropsini, 456  
*Hydrothrix gardneri*, 154, 156  
*Hyemoschus*, 206, 219  
*Hylaeochampsa*, 412  
 Hymenoptera, 23, 296, 307  
 Hypertragulidae, 207, 222  
*Hypertragulus*, 221  
*Hyposmocoma*, 89  
 Hypothesis test, 48–54, 781–793  
*Hyracotherium*, 857  
 Hystricognathi, 604–605, 608–611, 613, 615  
  
*Ictonyx*, 590  
*striatus*, 581, 589–590  
 Identifying conflicting signal in a multigene analysis reveals a highly resolved tree: the phylogeny of Rodentia (Mammalia), Ronald W. DeBry, 604–617  
 Idiosyncratic markers, 296–310  
 Impala, 210  
 Ichthyosaurs, 501  
 Incomplete taxa, 528–538  
 Incongruence, 11, 15, 20, 28, 37, 39–41, 43, 45, 404, 451, 559, 571–572, 581, 587, 608, 613  
 length difference, 75–77, 406, 408, 463  
 length difference (ILD) test (*see also* partition homogeneity test), 3, 11, 15, 26, 28, 75–76, 418, 467, 604, 607–609, 613, 622, 773, 853–855, 860, 862  
 Inconsistency, 229–238, 641–648  
 Incorrect model, 674–683  
 Indel-change ratio, 556–557  
 Indels, 283–295, 300, 377–378, 392, 394, 397, 574–575, 651, 823, 827  
 characters, 389, 823, 826, 829  
 coding, 444, 575  
 parsimony informative, 823  
 Independent and identically distributed (IID), 842, 847  
 Ingroup, 27, 56, 89, 91–92, 96–97, 99, 197, 229–230, 386–387, 389, 392, 394, 396–397, 443, 576, 620–622, 748, 750, 753, 757, 764, 775, 824, 826



- Informative characters, 16, 575, 583
- Inquilina*, 1
- dawsoni*, 2
- schwarzi*, 2
- Insecta, 37, 296, 430
- Insects, 23, 32, 34, 89, 106, 430
- Insertion (*see indel*)
- Internal transcriber spacer (ITS), 73, 76–77, 298, 336, 370–371, 382, 820–841
- Intraorganismal homology, character construction, and the phylogeny of Aetosaurian Archosaurs (Reptilia, Diapsida), Simon R. Harris, David J. Gower, and Mark Wilkinson, 239–252
- Intraspecific phylogeny of the New Zealand short-tailed bat *Mystacina tuberculata* inferred from multiple mitochondrial gene sequences, Brian D. Lloyd, 460–476
- Intron–exon, 20, 26
- Introns, 376, 383, 391, 394, 571–593
- Invertebrates, 429, 618–619
- Ips* beetles, 677
- IRBP, 604–614, 738
- Irregularia, 328
- Ischnura*, 91, 94, 102
- aurora*, 94
- heterosticta*, 94
- Island evolution, 820–841
- Iskandar, Djoko, *see* Evans, Ben J., 794–823
- Isopoda, 430
- Is sparse taxon sampling a problem for phylogenetic inference?, David M. Hillis, David D. Pollock, Jimmy A. McGuire, and Derrick J. Zwickl, 124–126
- Ixodes*
- affinis*, 300
- auritulus*, 300
- hexagonus*, 299–300
- holocyclus*, 300
- pilosus*, 300
- simplex*, 300
- ss.*, 298, 300, 304, 307, 309
- tasmani*, 300, 304, 309
- uriae*, 300
- Ixodidae, 296–310
- Jacarea, 409, 412
- Jaccard distance, 718
- Jackknife, 55–65, 128–129, 409, 554, 556, 560–561, 575, 581
- analysis, 407
- parsimony, 129, 557, 559
- scores, 412
- support, 419, 540, 559, 561, 582–583
- values, 589, 665
- Janacus*, 619, 623, 632, 636, 639
- Janneria pustulata*, 640
- Japygidae, 557
- Jean-Marie, Alain, *see* Gascuel, Olivier, 110–118
- Jenkinia*, 314–315
- Jenkinidae, 314
- Jennings, W. Bryan, Eric R. Pianka, and Stephen Donnellan, Systematics of the lizard family Pygopodidae with implications for the diversification of Australian temperate biotas, 757–780
- Ji, Shuqing, *see* Danforth, Bryan N., 23–36
- Johnson, Kevin P., Richard J. Adams, Roderic D. M. Page, and Dale H. Clayton, When do parasites fail to speciate in response to host speciation?, 37–47
- Jones, Kate E., *see* Bininda-Emonds, Olaf R. P., 724–729
- Jordan, Steve, Chris Simon, and Dan Polhemus, Molecular systematics and adaptive radiation of Hawaii's endemic damselfly genus *Megalagrion* (Odonata: Coenagrionidae), 89–109
- Joyce, Paul, *see* Minin, Vladimir, 674–683
- Jukes–Cantor
- distances, 425
- model, 133, 371, 424, 485, 530, 644, 666–669, 703, 708, 711–715, 784–785, 787–788, 820, 825, 831–832, 834
- Juliformia, 557
- Jungles
- analysis, 39, 43, 45
- optimizations, 42
- Jurassic, 746, 753
- late-, 549, 746
- lower, 746, 749
- mid-, 745
- upper, 753
- $\kappa$ -casein, 206–207, 209–212, 215
- Kebira*, 333
- Kelly, Christopher M., R. Nigel P. Barker, and Martin H. Villet, Phylogenetics of advanced snakes (Caenophidia) based on four mitochondrial genes, 439–459
- Kendall's
- shape space, 66
- tangent space, 66–67
- Kimura three-parameter model, 577, 581
- Kimura two-parameter model, 133, 229, 231, 236, 485, 577, 700, 703, 762, 801, 823, 826, 850
- Kishino–Hasegawa test, 4, 10, 15–22, 212, 216, 390, 392, 394–396, 398, 445, 504, 781
- Kishino, Hirohisa, *see* Wiegmann, Brian M., 745–756
- Kitchen, Christina M. R., *see* Suchard, Marc A., 649–664
- Kiwi, 474, 550
- Kjer, Karl M., *see* Xia, Xuhua, 283–295
- Koepfli Klaus-Peter and Robert K. Wayne, Type I STS markers are more informative than cytochrome *b* in phylogenetic reconstruction of the Mustelidae (Mammalia: Carnivora), 571–593
- Kolmogorov–Smirnov test, 190
- Krebsia* sp., 639
- Kulczynski distance, 718
- Kullback–Leibler distance, 782, 785
- Kumar, Sudhir, *see* Rosenberg, Michael S., 119–123
- Labulla*, 71, 77
- thoracica*, 71–73, 88
- Lacanicephalidea, 430
- Lactoferrin, 206, 209–212, 215, 218, 220
- Lagomeryx*, 224
- Lagomorpha, 606, 839–851
- Laminacauda gigas*, 71
- Lamontia*, 314–315, 317, 323–324
- zona*, 333
- Lamprophiinae, 439, 441, 447, 455–456
- Lamprophis*
- fuliginosus*, 441
- inornatus*, 441, 445, 459
- Lander, Katherine M., *see* Huelsenbeck, John P., 641–648
- Lanice conchylega*, 316
- Lapointe, François-Joseph, Mark Wilkinson, and David Bryant, Matrix representations with parsimony or with distances: two sides of the same coin?, 865–868
- Lapointe, François-Joseph, *see* Wilkinson, Mark, 127–130
- Larus glaucooides*, 286
- Larvae, 8, 618, 631
- Larval characters, 8–9
- Lasioglossum*, 23–28, 30, 32–33

- (Dialictus) cressonii*, 27  
*(Dialictus) figueresi*, 27, 33  
*(Dialictus) gundlachii*, 27  
*(Dialictus) hyalinum*, 27  
*(Dialictus) imitatum*, 27  
*(Dialictus) parvum*, 27  
*(Dialictus) pilosum*, 27  
*(Dialictus) rohweri*, 27  
*(Dialictus) tegulare*, 27  
*(Dialictus) umbripenne*, 27  
*(Dialictus) vierecki*, 27  
*(Dialictus) zephyrum*, 24, 27, 33  
*(Evyllaenus) albipes*, 26–27, 33  
*(Evyllaenus) apristum*, 27  
*(Evyllaenus) boreale*, 27  
*(Evyllaenus) brevicorne*, 27  
*(Evyllaenus) calceatum*, 24, 27, 33  
*(Evyllaenus) cinctipes*, 27  
*(Evyllaenus) comagenense*, 27  
*(Evyllaenus) duplex*, 27  
*(Evyllaenus) fulvicorne*, 27  
*(Evyllaenus) gattaca*, 27  
*(Evyllaenus) inconditum*, 27  
*(Evyllaenus) interruptum*, 27  
*(Evyllaenus) laticeps*, 24, 27  
*(Evyllaenus) limbellum*, 27  
*(Evyllaenus) lineare*, 27  
*(Evyllaenus) lucidulum*, 27  
*(Evyllaenus) malachurum*, 27  
*(Evyllaenus) marginatum*, 24, 27, 33  
*(Evyllaenus) mediterraneum*, 27  
*(Evyllaenus) morio*, 27  
*(Evyllaenus) nigripes*, 27  
*(Evyllaenus) pauxillum*, 27  
*(Evyllaenus) pectorale*, 27  
*(Evyllaenus) politum*, 24, 27, 33  
*(Evyllaenus) puncticolle*, 27  
*(Evyllaenus) quebecense*, 27  
*(Evyllaenus) subtropicum*, 27  
*(Evyllaenus) truncatum*, 27  
*(Evyllaenus) villosulum*, 26–27  
*(Hemihalictus) lustrans*, 24, 27, 33  
*(Lasioglossum) athabascense*, 27  
*(Lasioglossum) coriaceum*, 26  
*(Lasioglossum) fuscipenne*, 27  
*(Lasioglossum) leucozonium*, 24  
*(Lasioglossum) pavonotum*, 27  
*(Lasioglossum) sisymbrii*, 27  
*(Lasioglossum) titusi*, 27  
*(Paralictus) asteris*, 27  
*(Sphecodogastra) noctivaga*, 27  
*(Sphecodogastra) oenotherae*, 27  
*(Sudila) alphenum*, 27  
*Laticauda*, 451  
*colubrina*, 441  
*Latimeria chalumnae*, 286  
*Laupala*, 833  
 Least and most powerful phylogenetic tests to elucidate the origin of the seed plants in the presence of conflicting signals under misspecified models, Stéphane Aris–Brosou, 781–793  
 Least-squares  
   algorithm, 866  
   criterion, 865  
 Lee, M. S. Y. and A. F. Hugall, Partitioned likelihood support and the evaluation of data set conflict, 15–22  
 Leeches, 430  
*Leioheterodon*, 451, 456  
   *madagascariensis*, 441  
*Lelapia*, 314–315, 324  
 Lelapiidae, 314, 329  
 Lemuridae, 711–713  
 Lemuriform, 711–713  
 Lemurs, 52–53, 524, 706,  
   mouse, 705–706, 708, 711–715  
 Le Parco, Yannick, *see* Manuel, Michael, 311–333  
*Lepilemur*, 706  
*Lepthyphantes minutus*, 73, 88  
*Leptictis*, 858  
 Leptomerycidae, 222  
*Leptomeryx*, 222  
*Leptonetis perplexus*, 639  
*Leptonycteris curasoae yerbabuena*, 473  
*Leptotila*, 41  
   *jamaicensis*, 38, 41–42  
   *plumbeiceps*, 38  
   *rufaxilla*, 38  
   *verreauxi*, 41  
   *verreauxi angelica*, 38  
   *verreauxi fulviventris*, 38  
*Leptynoma hessei*, 756  
*Lestis*, 2  
 Leucaltidae, 314  
*Leucaltis*, 314–315, 320, 324, 332  
   *clathria*, 316  
*Leucandra*, 314–315, 320, 322–324, 332–333  
   *aspera*, 316  
*Leucascandra*, 314–315, 332  
 Leucascidae, 314  
*Leucetta*, 314–315, 320, 322, 324, 330, 332–333  
   *chagosensis*, 316  
 Leucettidae, 314  
*Leucilla*, 314–315, 332  
*Leucocrossuromys leucurus*, 189  
*Leuconia*, 314–315, 320, 322–324, 328, 330, 332–333  
   *johnstoni*, 333  
   *nivea*, 316, 329, 333  
   *ochotensis*, 333  
*Leucopsila*, 314–315, 317, 323  
*Leucosolenia*, 314–315, 320, 322–323, 329, 332–333  
   *laxa*, 332  
   sp., 316  
   *variabilis*, 329  
 Leucosoleniida, 314, 320, 323  
 Leucosoleniidae, 314  
 Levin, Rachel A., Lucinda A. McDade, and Robert A. Raguso, Systematic utility of floral and vegetative fragrance in two genera of Nyctaginaceae, 334–351  
*Lialis*, 757–758, 762, 764, 767, 770–771, 775  
   *burtonis*, 759, 762  
   *jicari*, 759  
*Liancalus* sp., 756  
 Lice, 37–47, 430  
 Lichens, 430, 518  
*Ligeromeryx*, 224  
 Likelihood (*see* maximum likelihood), 352–367  
   analysis, 18, 263, 374, 708, 715, 803–804, 807  
   framework, 369  
   methods, 286  
   model, 17, 212, 356–358, 362, 481, 506, 555, 674, 681, 705  
   ratio tests (LRT), 41–42, 48, 54, 63, 95, 352, 363–364, 377, 379, 390, 394, 445, 575, 580, 598, 600, 604–617, 621, 655, 674–683, 714, 825, 849, 801

- trees, 39, 506, 508, 762, 764, 802  
weight test, 18–19, 22
- Limnonectes*, 794–795, 797–799, 802, 805–809, 811–812, 815
- acanthi*, 797, 802, 807, 809–811, 815
- arathooni*, 795, 797, 812, 815
- asperatus*, 797, 799, 815
- blythii*, 797, 808
- cf. *acanthi*, 802, 810, 815
- cf. *blythii* 1, 804, 815
- cf. *blythii* 2, 804, 815
- cf. *blythii* 3, 802, 804, 815
- cf. *heinrichi*, 812, 815
- cf. *kuhlii* 1, 795, 797, 808, 815
- cf. *kuhlii* 2, 795, 797, 808, 815
- cf. *kuhlii* 3, 795, 797, 808, 815
- cf. *magnus*, 797, 802, 807, 811, 815–16
- cf. *microtypanum* 1, 795, 797, 802, 812, 816
- cf. *microtypanum* 2, 795, 797, 802, 812, 816
- cf. *modestus*, 795, 797, 802, 812, 816
- cf. *modestus* complex 2, 797, 802, 812, 816
- dammermani*, 809
- diuatus*, 811
- finchi*, 802, 804, 816
- grunniens*, 795, 802, 804, 809, 816
- gyldenstolpei*, 797, 816
- heinrichi*, 795, 797, 816
- ibanorum*, 802, 804, 816
- ingeri*, 797, 804, 816
- kardasani*, 809, 816
- laticeps*, 797, 816
- leporinus*, 797, 816
- leytensis*, 797, 802, 807, 809–812, 816–817
- limborgii*, 797
- macrocephalus*, 797, 802, 807, 811, 817
- macrodon*, 797, 804, 816, 8167
- magnus*, 797, 802, 807, 811, 817
- malesianus*, 797, 800, 804, 808, 816, 817
- micrixalus*, 811
- microdiscus*, 795, 809, 817
- palavanensis*, 802, 804, 811, 817
- paramacrodon*, 802, 804, 808, 817
- parvov*, 802, 804–807, 811, 817
- pileata*, 797
- shompenorum*, 797
- sp. 1, 797, 817
- sp. 2, 797, 817
- sp. D, 797, 812, 817
- sp. G, 817–818
- sp. G2, 797, 812
- sp. I, 802, 804, 807, 812, 818
- sp. nov., 797
- sp. T, 797, 812, 818
- sp. V complex 1, 797, 812, 818
- sp. V complex 2, 797, 802, 819
- visayanus*, 797, 802, 807, 811, 819
- woodworthi*, 797, 802, 807, 811, 819
- Limulus polyphemus*, 300
- Linear model, 684–695
- Linnean parsimony, 342
- Linyphia*, 77
- triangularis*, 73, 88
- Linyphiidae, 70–88
- Linyphiini, 72, 77
- Liocheles waigiensis*, 300
- Liolaemidae, 159
- Liolaemus*, 159–185, 688
- austromendocinus*, 161, 163, 167, 178–179
- bibronii*, 164, 167
- buergeri*, 161, 178, 182
- capillitas*, 161, 163, 167, 179
- ceii*, 161, 178, 182
- ceii-kriegi* clade, 172
- christiani*, 161
- curis*, 161
- elongatus*, 159–161, 163, 166–167, 171–172, 178–179, 182
- elongatus-kriegi* complex, 159–161, 167, 182
- gracilis*, 164, 167
- helioderms*, 161
- kingii*, 164, 167
- kriegi*, 159–161, 164, 166–167, 171–172, 178, 182
- leopardinus*, 161
- lineomaculatus*, 164, 167
- neuquensis*, 164, 167
- petrophilus*, 161, 163, 166–167, 172, 178–179, 182
- pictus*, 164, 167
- pseudocnomalus*, 165, 167
- sp. 1, 163, 182
- sp. 2, 164, 179
- sp. 3, 163–164, 167
- sp. 4, 164, 179, 182
- sp. 5, 163, 171, 178, 182
- sp. 6, 163, 171, 178, 182
- sp. 7, 163, 171, 178, 182
- sp. 8, 164, 179, 182
- sp. A, 164, 179, 182
- sp. B, 164, 178, 182
- sp. C, 164, 178
- thermarum*, 161, 178
- vallecurensis*, 164, 167
- Liophis*, 447, 451
- reginae*, 441
- Lithonida, 314, 317, 323, 329–330
- Littorina littorea*, 640
- Liverworts, 430
- Lizards, 105, 159–185, 286, 306, 423, 689, 691, 693, 757–780
- agamid, 758
- New World, 160
- pygopodid, 757–780
- Llamas, 221
- Lloyd, Brian D., Intraspecific phylogeny of the New Zealand short-tailed bat *Mystacina tuberculata* inferred from multiple mitochondrial gene sequences, 460–476
- Lobelioids, 833
- Local clock analysis, 89
- Local molecular clock, 89–109, 705–716
- LogDet
- analysis, 3, 6–7, 11
- method, 784
- tree, 4, 7
- LogDet/Paralinear
- analysis, 614, 621
- distance (*see also* paralinear distance), 284, 287, 289, 291, 293, 397, 580, 610, 612, 676
- transformation, 579
- Log-likelihood, 596, 598–599, 614, 655, 782
- ratio test, 3–4
- scores, 445, 464, 607, 761
- values, 445, 761
- Long branch
- attraction, 63, 79, 82, 96, 327, 354–370, 386, 419, 423–428, 443, 478, 483, 510, 531, 537, 558, 590, 594
- effects, 2

- subdivision, 423–428  
 Longhorn beetle, 89  
 Longirostres, 390–391, 398, 400  
*Longosuchus*, 241–243, 247–252  
 Long wavelength (LW)  
   opsin, 26–28  
   rhodopsin, 23  
*Lontra*, 577, 590  
   *canadensis*, 573  
   *felina*, 573  
   *longicaudis*, 573  
*Lorancameryx*, 224  
*Lordotus* sp., 756  
*Loris*, 706  
 Lorisiform, 711–713  
 Loxocemidae, 440  
*Loxocemus bicolour*, 440  
*Loxodonta*, 591  
 Lucas, Spencer G., *see* Heckert, Andrew B., 253–255  
*Lucasuchus*, 241–243, 250–251  
*Lutra*, 590  
   *lutra*, 573  
   *maculicollis*, 583, 590  
 Lutrinae, 571–573, 581, 590, 846  
*Lycodon*, 447, 451, 456–457  
   *capucinus*, 440  
   *laensis*, 440  
*Lycodonomorphus*, 456  
 Lycodontinae, 456  
 Lycodontini, 457  
  
*Macaca*, 706, 741  
   *fascicularis*, 736, 741  
   *mulatta*, 736  
   *nemestrina*, 736, 741  
 Macaque, 52–53  
*Macroderma gigas*, 472  
*Macrogalea*, 1, 4, 7–8, 10–13  
   *candida*, 2, 10, 12  
   *scaevolae*, 12  
   *zanzibarica*, 2, 10, 12  
*Macropisthodon*, 447, 451, 457  
   *rudis*, 440, 447, 456  
 Macrostromata, 440  
*Madagascarophis*, 451  
   *colubrine*, 441  
 Magnoliaceae, 346  
 Magnolias, 346  
 Magpie goose, 388  
 Mahalanobis distance, 192, 491  
 Malacostraca, 557  
*Malluvium* sp., 639  
 Maloideae, 375  
*Malpolon*, 451  
   *monspessulanus*, 441, 459  
 Mammalia, 566, 571–593, 604–605, 861  
 Mammalian phylogeny, 857  
 Mammals, 16, 23, 56, 66, 106, 206, 219, 224, 261–262, 283–287, 293, 415,  
   518, 524, 550, 571, 605, 794, 853, 861  
   eutherian, 249, 585, 860  
   placental, 591  
 Mandible, 186–205  
 Mandibular  
   characters, 192  
   dendograms, 195  
 Mandibulata, 557  
*Manuelia*, 8  
   *postica*, 2  
 Manuelliini, 1, 9  
 Mantel  
   matrix correlations, 493–494, 497  
   statistics, 488, 491, 493  
   test, 491  
 Manuel, Michael, Carole Borchiellini, Eliane Alivon, Yannick Le  
   Parco, Jean Vacelet, and Nicole Boury-Esnault, Phylogeny and  
   evolution of Calcareous sponges: monophyly of Calcinea and  
   Calcaronea, high level of morphological homoplasy, and the  
   primitive nature of axial symmetry, 311–333  
*Maoricicada*, 674  
   *campbelli*, 474  
*Maoricrypta*, 619, 623, 631–632, 636  
 Markov chain (*see also* MCMC), 50, 133–134, 140, 165, 212, 377, 445,  
   576, 666, 749–750, 760, 785  
   continuous time, 179, 644  
   model, 782, 785, 791, 841  
   processes, 594  
 Markov chain Monte Carlo (MCMC), 48–54, 95, 131–158, 159, 212,  
   377, 445, 478, 484, 576, 604, 607, 649–664, 667, 674, 709, 711, 749,  
   751, 760  
   algorithms, 135–136, 665–666, 697, 711, 785  
   analysis, 140, 213, 486, 750, 801  
   approach, 702, 750  
   Metropolis-coupled, 604, 607, 621, 623  
   procedure, 748, 750  
   processes, 825  
   sampling, 477–487, 612  
   simulations, 165  
*Marmota*, 186–205  
   *baibacina*, 189, 192–193, 196, 199, 201  
   *baibacina centralis*, 201  
   *bobak*, 189, 192, 196–197, 199, 202  
   *broweri*, 186, 189–190, 192–193, 196–198, 202  
   *caligata*, 186, 190, 192, 194–196, 198, 202  
   *caligata caligata*, 202  
   *caligata cascadenis*, 202  
   *caligata nivaria*, 202  
   *caligata okanagana*, 202  
   *caligata oxytona*, 202  
   *caligata sheldoni*, 202  
   *caligata vigilis*, 202  
   *camtschatica*, 186, 189, 192, 196, 198  
   *camtschatica bungei*, 202  
   *caudata*, 188–190, 192, 195–196, 199  
   *caudata aurea*, 202  
   *flaviventris*, 192, 194–197, 205  
   *flaviventris avara*, 203  
   *flaviventris dacota*, 203  
   *flaviventris engelhardti*, 203  
   *flaviventris flaviventris*, 203  
   *flaviventris luteola*, 203  
   *flaviventris nosphora*, 203  
   *flaviventris obscura*, 203  
   *flaviventris parvula*, 203  
   *flaviventris sierrae*, 203  
   *himalayana*, 188–189, 195–197, 203  
   *himalayana himalayana*, 203  
   *himalayana robusta*, 203  
   *marmota*, 186–187, 189, 192, 196, 203  
   *marmota marmota*, 203–204  
   *menzbieri*, 188–189, 192, 195–197, 199, 204  
   *monax*, 186, 189, 192–193, 196–197, 199, 204  
   *monax canadensis*, 204  
   *monax ignava*, 204  
   *monax monax*, 204

- monax ochracea*, 204  
*monax petrensis*, 204  
*monax prebolorum*, 204  
*monax rufescens*, 204  
*olympus*, 186, 190, 192–198, 204  
*sibirica*, 189–190, 192–193, 196, 199, 204  
*vancouverensis*, 186, 188, 190, 192, 194, 196, 198, 204
- Marmotini, 197
- Marmots (*see also Marmota*), 186, 188–189, 192–195, 197, 205  
 Alaskan, 186, 193, 195, 198  
 Alpine, 186–187, 198–199  
 black-capped, 186, 193, 198–199  
 Eurasiatic, 186, 193, 198–199  
 hoary, 194  
 long-tailed, 195, 199  
 Menzbier, 189, 199  
 Olympic, 194–195, 197–198  
 Palaearctic, 187, 198–199  
 Vancouver Island, 189, 194, 196–199  
 yellow-bellied, 196–198, 205
- Marsupials, 524
- Martens, 571–573  
 American, 573
- Martes*, 577, 581, 590  
*americana*, 573, 581, 590  
*pennanti*, 573, 581, 590
- Marsupials, 709
- Mast, Austin R. and Reto Nyffeler, Using a null model to recognize significant co-occurrence prior to identifying candidate areas of endemism, 271–280
- Maticora*, 447, 451  
*bivigata*, 441
- Matrix correlation analysis,  
 nesting, 241  
 parsimony, 241  
 with distances (MRD), 865–868  
 with parsimony (MRP), 255, 439, 455–456, 839–851, 865–868
- Matrix representations with parsimony or with distances: two sides of the same coin? François-Joseph Lapointe, Mark Wilkinson, and David Bryant, 865–868
- Matrix-weighted  
 analysis, 622  
 parsimony, 623
- Maximum likelihood, 16–18, 23, 26, 28, 39, 41, 63, 76, 95, 98–100, 121, 128, 133, 159, 229–238, 283, 285, 287, 293, 320, 363, 365, 368–373, 386, 439–459, 463, 468, 477–487, 506, 571, 585, 594–603, 604–617, 622, 641–642, 656, 665–666, 671–683, 696–704, 705–716, 726, 801  
 analysis, 1, 3, 7, 11, 26–27, 30, 42, 63, 76, 79, 89, 95–97, 99, 166–167, 171, 182, 211–212, 215, 231, 318, 322, 327, 329, 341, 377–378, 386, 389–90, 394–396, 407, 419, 715, 737, 740, 797, 801, 824, 829, 850  
 bootstrap support, 667–668  
 estimates, 166, 394, 594, 596, 601, 604, 669, 709, 711–712, 714, 748, 850  
 model, 11, 45, 96, 159, 220, 358, 397  
 searches, 95  
 tests, 614  
 trees, 12, 18, 20, 22, 30, 42–45, 81, 96, 128, 323, 328, 368, 371, 383, 396, 455–456, 479, 574, 576–577, 580–581, 583, 589–590, 607, 611, 666, 677, 681, 762, 767, 771, 781, 825, 827–829, 849  
 value, 140
- Maximum parsimony (*see also* parsimony), 1, 12, 95, 98, 120, 159, 229–238, 293, 298, 306–307, 318, 327, 339–340, 425, 439–459, 463, 468, 478, 489, 607, 609–610, 613–614, 726, 801, 820, 823, 826, 833  
 analysis, 3, 5–7, 10–11, 95, 166–167, 182, 211, 213, 215, 275, 317, 322, 327, 447, 467, 571, 577, 580–581, 615, 737, 740, 797, 801, 824, 829, 850  
 reconstruction, 450  
 trees (*see also* most-parsimonious trees), 4, 110, 213, 215, 217, 240, 242–243, 248, 252, 275, 317, 320, 323, 329, 336, 339–341, 346, 359, 378, 383–384, 444, 446–447, 463, 574, 576–577, 579–581, 589–590, 607–608, 824, 826–828
- McDade, Lucinda A., *see* Levin, Rachel A., 334–351
- McGuire, Jimmy A., *see* Evans, Ben J., 794–823
- McGuire, Jimmy A., *see* Hillis, David M., 124–126
- McLachlan, Robert, *see* Gascuel, Olivier, 110–118
- Megalagrion*, 89–109, 833  
*adytum*, 93, 103, 105  
*blackburni*, 93, 103  
*calliphya*, 93, 103  
 damselflies, 89–109, 833  
*eudytum*, 89, 93, 103, 105  
*hawaiiense*, 93, 101–104, 106  
*heterogamias*, 93, 101, 103–104, 106  
*jugorum*, 103, 106  
*kauaiense*, 93, 101, 103–104, 106  
*koelense*, 92–93, 101, 104  
*leptodemas*, 93, 103  
*mauka*, 89, 93, 101, 103, 105  
*molokaiense*, 106  
*nesiotes*, 89, 93, 101, 103, 105–106  
*nigrohamatum*, 93, 103  
*nigrolineatum*, 93  
*oahuense*, 89, 93, 101, 103, 105  
*oceanicum*, 93, 103  
*oresitrophum*, 89, 93, 99, 101, 103–104, 106  
*orobates*, 89, 93, 99, 101, 103–104, 106  
*pacificum*, 89, 92–93, 99–100, 103, 105–106  
*paludicola*, 89, 93, 101, 103, 105–106  
 sp. nov., 93  
*vagabundum*, 89, 93, 103, 105  
*williamsoni*, 92, 103  
*xanthomelas*, 89, 91–93, 103, 105
- Megaloptera, 106
- Megapodon, 314–315, 328, 333
- Megophryidae, 794
- Mehelya*, 447, 451, 455–456  
*capensis*, 441  
*nyassae*, 441, 459
- Melanesobasis*, 91
- Melanosuchus*, 391, 396, 412  
*niger*, 388, 405
- Meles*, 581, 590  
*meles*, 573–574, 577, 582
- Melinae, 571–573, 581
- Mellivorinae, 572–573
- Melnick, Don J., *see* Evans, Ben J., 794–823
- Melogale*, 589–590  
*moschata*, 581–583, 590
- Mephitinae, 572–573, 590, 846
- Merostostomata, 300
- Merycodontinae, 224
- Mesonychia, 853–855, 858, 860
- Mesostigmata, 300, 309
- Mesozoic, 549–553, 745–746
- Meta-optimality criterion, 554–564
- Metastrata, 296, 299, 304, 307
- Metazoa, 311–333, 520
- Meteoriaceae, 430
- Methanococcus jannaschii*, 659
- Metriopelia ceciliae*, 38
- Metropolis-coupled MCMC, 604, 607, 621, 623
- Metropolis–Hastings

- algorithm, 662  
 criterion, 50  
 proposal, 654–655
- Metropolis-within-Gibbs cycle, 654–655
- Metrosideros polymorpha*, 820
- Microbats, 460
- Microbes, 429
- Microcebus*  
*berthae*, 706  
*griseorufus*, 706  
*murinus*, 706  
*myoxinus*, 706  
*ravelobensis*, 706  
*rufus*, 706  
*sambiranensis*, 706  
*tavaratra*, 706
- Microchiroptera, 460–476
- Microcionia prolifera*, 316
- Microevolutionary model, 692
- Microhylidae, 794
- Microlynphia*, 77  
*dana*, 73, 88
- Micruroides*, 447, 451  
*euryxanthus*, 441
- Micrurus*, 447, 451  
*diastema*, 441  
*fulvius*, 441
- Miller, Jeremy A., Assessing progress in systematics with continuous jackknife function analysis, 55–65
- Millipedes, 430
- Minchinella*, 314–315, 317, 323, 328–329, 332
- Minchinellidae, 314, 320, 328
- Minimum evolution, 121, 287, 478, 489, 579  
 tree, 506, 580, 610
- Minimum-length trees, 415, 750
- Minin, Vladimir, Zaid Abdo, Paul Joyce, and Jack Sullivan, Performance-based selection of likelihood models for phylogeny estimation, 674–683
- Mink, American, 573
- Miocene, 207, 221, 224–225, 451, 549, 629, 761, 776  
 early-, 206–207, 209, 216, 218, 224–225  
 mid-, 206, 217–218, 224–225  
 late-, 218, 224
- Mirabilis*, 334–351  
*alipes*, 340  
*bigelovii*, 336  
*greenii*, 343–344  
*jalapa*, 336  
*longiflora*, 336  
*macfarlanei*, 341, 343–344  
*multiflora*, 347  
*pudica*, 340
- Mirza, 706
- Misleading zones, 229–238
- Missing data, 528–538
- Missing data, incomplete taxa, and phylogenetic accuracy, John J. Wiens, 528–538
- Mites, 299–300, 430
- Mitochondrial  
 alleles, 41  
 DNA, 3–4, 7, 12, 37, 48, 52, 89, 94–101, 103, 159–185, 296, 386–387, 395, 407–408, 415, 418, 423, 439–459, 460–461, 464, 471, 474, 503–504, 506, 508–509, 548, 551, 571–572, 583, 586, 589, 656, 674, 677, 680–681, 735, 757–758, 760–762, 764, 767, 770–771, 773, 775–776, 794, 798, 801, 808, 810–812
- DNA tree, 178
- genes, 5–6, 10, 16, 32, 41, 74, 439, 451, 460, 462, 510, 572, 587, 649, 651, 656
- genomes, 56, 58–59, 238, 296–297, 301, 303, 307, 309, 462–463, 478, 577, 706
- RNA, 445
- rRNA, 615
- tRNA, 615
- Mnemiopsis*, 317  
*leidyi*, 316
- Models  
 analysis, 542  
 Bayesian, 49, 650  
 birth–death, 641, 644–645, 647, 761  
 cladogenetic, 641  
 continuous–time Markov, 131–134, 147, 149, 651  
 discrete, 594, 602  
 DNA substitution, 444  
 equal-rates, 57  
 evolutionary, 126, 352, 652, 665, 668, 672, 692, 696–697, 705, 727, 781–782, 788, 791–792, 801, 829, 850  
 Felsenstein, 463, 703, 708–709, 711–715, 748, 850  
 gamma, 594–603, 750  
 general-time-reversible (GTR), 3–4, 7–8, 18–19, 26, 28–30, 42, 95, 97, 165–166, 212, 286, 318, 390, 392, 396, 445, 463, 576, 579, 585, 608–611, 613, 666–669, 674, 677, 679, 681–682, 737, 762, 784, 801–802, 825, 831, 834  
 Hasegawa-Kishino-Yano (HKY), 4, 7, 49, 52–53, 121, 135, 140, 143, 215, 377, 396, 423, 444, 463–464, 466–468, 471, 506, 508, 577, 614, 681–682, 703, 737, 750, 785, 787  
 Hempel–Oppenheim, 260, 263  
 homogeneous, 792  
 incorrect, 674–683  
 Jukes–Cantor, 133, 371, 424, 485, 530, 644, 666–669, 703, 708, 711–715, 784–785, 787–788, 820, 825, 831–832, 834  
 Kimura three-parameter, 577  
 Kimura two-parameter, 133, 229, 231, 236, 485, 577, 700, 703, 762, 801, 823, 826, 850  
 likelihood, 17, 212, 356–358, 362, 481, 506, 555, 674, 681, 705  
 linear, 684–695  
 Markov, 147, 594–603, 782, 785, 791, 841  
 maximum likelihood, 11, 45, 96, 159, 220, 358, 397  
 microevolutionary, 692  
 misspecification, 665–673  
 molecular clock, 48  
 nested, 606  
 nonreversible nucleotide substitution, 48  
 nuclear substitution, 215, 287, 377, 604–617, 658, 674–683, 708, 785  
 null, 271–280, 480, 482, 484, 717–723  
 parsimony, 361, 363  
 phylogenetic, 133, 594, 649, 651, 654, 656, 661  
 Poisson process, 134  
 rates-across-sites, 595–596  
 rate homogeneity, 463  
 regression, 684, 686  
 site-specific-rates (SSR), 4, 8, 26–28, 30, 463, 466–468, 610, 612, 674  
 stochastic, 152, 705, 761, 833  
 substitution, 3, 140, 293, 371, 463, 577  
 Tamura and Nei, 703  
 three-parameter TN93, 293  
 time-homogeneous, 647  
 tree, 231, 423, 427, 540, 542, 761, 841–842  
 Wright–Fisher, 179
- Model-based Gaussian clustering (MBGC), 717–718, 722
- Models of evolution, 126, 352, 364, 377, 615, 665, 668, 672, 692, 696–697, 705, 727, 781–782, 788, 791–792, 801, 829, 850
- Molecular

- analysis, 103–104, 221, 323, 386, 397, 796  
 characters, 55, 70, 76–77, 131, 199, 209, 296, 298  
 cladograms, 187, 742  
 cladistics, 187  
 clock (*see also* Bayesian clocklike model, non-parametric rate smoothing), 11, 48, 50–53, 70, 81, 110, 229–231, 233, 386, 390, 395, 550, 641, 644, 647, 700, 705–716, 745, 754, 757–780, 782, 801–802, 825, 841  
 data, 57, 62, 75, 82, 99, 103–105, 187, 300, 317, 320, 328–329, 339, 369, 386–389, 397, 401, 403, 406, 423, 502–504, 510–511, 539, 543, 726–727, 760, 764, 767, 770, 796, 853, 857  
 dating analysis, 375  
 evolution, 20, 38, 41, 591, 594–603, 785, 791  
 local, 89–109  
 model, 48  
 partitions, 17  
 phylogenetics, 187, 283–295, 311, 715  
 phylogeny, 37–47, 374–385, 545, 781, 832  
 studies, 206, 386, 501, 504, 604, 614, 727  
 substitution, 37  
 systematics, 430, 501–514, 571–572, 591, 745–756, 820–841  
 tree, 103, 105–106, 386, 389–392, 394–396, 399, 403, 853, 858, 860
- Molecular and morphological phylogenies of Ruminantia and the alternative position of the Moschidae, Alexandre Hassanin and Emmanuel J. P. Douzery, 206–228
- Molecular phylogenetics of Allodapine bees, with implications for the evolution of sociality and progressive rearing, Michael P. Schwarz, Nicholas J. Bull, and Steven J. B. Cooper, 1–14
- Molecular systematics and adaptive radiation of Hawaii's endemic damselfly genus *Megalagrion* (Odonata: Coenagrionidae), Steve Jordan, Chris Simon, and Dan Polhemus, 89–109
- Molecules, 206–228
- Mollusks, 430, 520, 619, 633  
 deep sea, 430
- Monkeys, 707–708, 811  
 owl, 738
- Monochoria  
*cyanea*, 154, 156  
*hastata*, 154, 156  
*korsakovii*, 154, 156  
*vaginalis*, 154, 156
- Monocotyledones, 524  
*Monoplectroninia*, 329  
*Monosiga brevicolis*, 316
- Monte Carlo  
 error, 750  
 estimate, 50  
 permutation, 684–695  
 randomization test, 684  
 simulation (*see also* computer simulation and simulation), 53, 234, 717–718
- Morando, Mariana, Luciano J. Avila, and Jack W. Sites Jr., Sampling strategies for delimiting species: genes, individuals, and populations in the *Liolaemus elongatus-kriegi* complex (Squamata: Liolaemidae) in Andean–Patagonian South America, 159–185
- Morphological  
 analysis, 187, 213, 323, 501, 504, 541, 560, 605, 858  
 characters, 55, 57, 70, 72, 74, 87–88, 89, 91, 131–132, 135, 142, 178, 181, 199, 209, 213, 217, 219, 298, 313–314, 317, 323, 327–328, 340, 389–390, 400, 406–407, 409, 412, 420, 439, 442, 457, 474, 501–503, 506, 509–510, 537, 539–543, 545, 559, 572, 604, 632, 738, 742, 748, 760, 855–857  
 data, 16, 20, 74, 103, 143, 182, 186–187, 243, 305, 315, 323, 329, 339, 369, 387–388, 397, 400–401, 403, 406, 423, 439, 501–503, 505, 726–727, 750, 764, 767, 771, 773, 796, 853–854, 857  
 evolution, 186–205, 404, 542  
 phylogeny, 206  
 studies, 727  
 support, 614–615  
 trees, 387, 392, 394, 396, 503, 860
- Morphology, 10, 12, 16–17, 23, 57, 206–228, 239–252, 253–254, 296, 307, 318, 323, 328, 333, 477, 488, 501–514, 539–548, 559, 572, 614, 619, 632, 691, 748, 775, 851–852  
 genitalic, 71, 82
- Morphometric  
 analysis, 197  
 data, 726  
 distance, 497
- Morphometrics  
 geometric, 66–69, 186–205, 488–500
- Morrison, David A., Branch lengths and support: revisited, 849–851
- Moschidae, 206–228
- Moschinae, 220
- Moschiola*, 206
- Moschus*, 206–207, 209, 212, 215, 219–221, 224  
*moschiferus*, 210, 219
- Mosses, 430
- Most-parsimonious,  
 combined tree, 16  
 trees, 3, 5–7, 15, 55–60, 63, 575, 609, 621, 801, 804, 809, 826, 857–857, 864
- Most recent common ancestor (MRCA), 48–49, 51–52, 179–180
- Moths, tortricine, 430
- Mourasuchus atopus*, 417
- Mouse, 290, 571, 591, 615  
 harvest, 677
- Mouse deer, 206, 854, 857
- Mouse lemur, 705–706, 708, 711–715
- mtLSU-rRNA, 735–738, 740–741
- mtSSU-rRNA, 735–738, 740
- Multidimensional scaling (MDS), 190, 194, 693, 718–719, 721
- Multigene analysis, 604
- Multiple trees, 849–851
- Multistate characters, 26, 75, 239, 255–257, 335
- Multivariate analysis, 652
- Muntiacinae, 209
- Muntiacus*, 209, 212, 215, 218–219, 222  
*reevesi*, 210
- Muridae, 606, 608
- Muroidea, 604–605, 609, 613–614
- Muroid phylogeny, 613
- Murrayona*, 314–315, 317, 324, 332–333  
*axinellae*, 316
- Murrayonidae, 314, 318, 329
- Murrell, Anna, Nick J. H. Campbell, and Stephen C. Barker, Value of idiosyncratic markers and changes to conserved tRNA sequences from the mitochondrial genome of hard ticks (Acari: Ixodida: Ixodidae) for phylogenetic inference, 296–310
- Mus*  
*domesticus*, 606  
*musculus*, 286, 316, 736
- Musca*, 751, 753–754  
*domestica*, 756
- Muscidae, 756
- Muscinae, 520
- Muscomorpha, 746, 750–751, 753
- Musk deer, 206–207, 210, 219–220
- Musophaga violacea*, 388
- Mussels, 59
- Mustela*, 590  
*erminea*, 573

- frenata*, 573, 577  
*vison*, 573, 577  
 Mustelidae, 571–593, 846  
 Mustelinae, 571–573, 581  
*Mycale fibrexillis*, 316  
*Mydas* sp., 756  
*Mydaus*, 573, 590  
 Mydidae, 750, 756  
 Myers, Daniel S., *see* Cummings, Michael P., 477–487  
 Myodonta, 604–606, 608, 610–611, 613, 615  
 Myomorpha, 614  
 Myriapoda, 557  
*Mystacina*, 462, 464, 467, 473  
   *aupourica*, 460, 474  
   *gigas*, 473  
   *rhyacobia*, 460, 474  
   *tuberculata*, 460–463, 466, 470–474  
  
 NADH, 460  
*Naja*, 447, 451  
   *kaouthia*, 441  
   *naja*, 441  
 National Science Foundation, 428–435  
 Natricinae, 439–440, 447, 452, 455–457  
*Natrix*, 447, 451  
   *natrix*, 440  
 Naylor, Gavin J. P., and Dean C. Adams, Total evidence versus relative evidence: a response to O’Leary et al. (2003), 864–865  
*ND1*, 73–74, 76, 657, 659  
*ND2*, 460, 462–468, 471, 657, 659, 758–759, 762, 777  
*ND3*, 657, 659  
*ND4*, 161, 163–165, 167, 181, 440, 443, 445–447, 451, 453, 455, 657, 659  
*ND4l*, 657, 659  
*ND5*, 656–657, 659  
*ND6*, 406, 657–659  
 Nearest Neighbor Interchange (NNI), 120, 698, 700  
   branch-swapping, 371  
 Near-optimal trees, 696  
 Neighbor joining (NJ), 121, 229–238, 368, 371–372, 506, 697, 699–702  
   analysis, 463, 530, 532  
   methods, 290, 293  
   tree, 211, 370, 372, 455, 462–463, 508, 702, 801  
 Nematocera, 754  
 Nematodes, 430  
 Nemertean, 430  
 Nembrinidae, 746, 753–754  
 Nembrinids, 753  
*Neoaetosauroides*, 241, 243, 248, 250–251  
*Neoceratina*, 2  
 Neogene, 206  
 Neologisms, 515, 517  
*Neorhynchocephalus volaticus*, 756  
*Neotragus pygmaeus*, 221  
*Neotrigonia*, 559  
*Nephila plumipes*, 300  
 Nepokroeff, Molly, Kenneth J. Sytsma, Warren L. Wagner, and Elizabeth A. Zimmer, Reconstructing ancestral patterns of colonization and dispersal in the Hawaiian understory tree genus *Psychotria* (Rubiaceae): a comparison of parsimony and likelihood approaches, 820–841  
*Neriene*, 72, 77, 82  
   *radiata*, 73–74, 77, 88  
   *variabilis*, 73–74, 77, 88  
*Nerita*, 317  
  
*albicilla*, 316  
*Nerodia*, 447, 451  
   *fasciata*, 440  
   *rhombifera*, 440  
   *taxispilota*, 440  
*Nesobasis*, 91, 94, 96  
*Nesomantis thomasseti*, 287  
 Nested-clade analysis (NCA), 159–185  
 Nested model, 606  
 Newton–Raphson  
   algorithm, 699  
   method, 698, 703  
 New World, 207, 548–549, 552  
   *Crocodylus*, 409  
   ground doves, 39  
   lizards, 160  
 New Zealand pigeon, 45  
*Nicotiana*, 347  
 Nielsen, Rasmus, *see* Huelsenbeck, John P., 131–158  
*Noctilio*, 471  
   *albiventris*, 464  
   *leporinus*, 464  
   spp., 463  
 Noctilionoidea, 460, 464  
 Nonhomogeneous maximum likelihood analysis, 390  
 Nonparametric  
   bootstrap, 506, 594, 665–667, 669, 671–672, 726, 760, 790, 801  
   bootstrap analysis, 165  
   rate smoothing method (NPRS), 76  
   sign-rank test, 16  
   test, 781  
 Nontrivial tree, 485  
 Norell, Mark, *see* Gatesy, John, 403–422  
*Nosomma*, 305  
   *monstrosum*, 299, 305  
*Nothofagus*, 160  
 Novacek, Michael J., *see* O’Leary, Maureen A., 853–866  
 Novel versus unsupported clades: assessing the qualitative support for clades in MRP supertrees, Olaf R. P. Bininda-Emonds, 839–851  
*Novosieversia glacialis*, 382  
   nrDNA, 336  
*Nucella*, 631  
 Nuclear  
   alleles, 41, 103  
   DNA, 37, 89, 95, 99, 103, 221, 374–375, 382–383, 407–408, 415, 418, 423, 509, 571–593, 735, 757–758, 760–762, 764, 767, 770–771, 773, 775–776  
   genes, 16, 28–29, 32, 41, 74, 375, 386, 572  
   genome, 374–375, 571, 604  
   sequence, 308  
   substitution model, 215, 287, 377, 604–617, 658, 674–683, 708  
 Nucleotides, 122, 124, 126, 296, 300–301, 303, 692  
   data, 305  
   sequence, 156, 697, 747  
   substitution, 121, 135, 375, 445, 465, 478, 480, 621, 651, 655, 750  
   substitution model, 377, 604–617, 658  
 Null  
   distribution, 30, 761  
   hypothesis, 16, 28, 241, 249, 278–279, 363–364, 425, 464, 478, 480, 598, 600, 607, 609, 611, 613, 718, 720, 751, 761, 770, 775, 781–784, 788, 790–792, 801  
   model, 271–280, 480, 482, 484, 717–723  
 Nyctaginaceae, 334, 344, 346–348  
 Nyffeler, Reto, *see* Mast, Austin R., 271–280  
 Nymphalid butterflies, 28



- Occam's window, 50  
*Occidozyga alevis*, 719, 815  
*Ochotona*, 609  
   *princeps*, 606  
*Odocoileini*, 209  
*Odocoileus*, 209, 212, 215, 218–219  
   *hemionus*, 210  
   *virginianus*, 210  
 Odonata, 89  
*Oena capensis*, 38, 46  
 Okapi, 206, 210  
*Okapia*, 207, 209, 212, 218–219, 221–222, 224  
   *johnstoni*, 210  
 Old World, 206–207, 548–550, 552  
   Arenaviridae, 740  
   badgers, 577, 590  
 O'Leary, Maureen A., John Gatesy, and Michael J. Novacek, Are the dental data really at odds with the molecular data? Morphological evidence for the whale phylogeny (re)reexamined, 853–866  
 Oligocene, 224–225, 795  
   early-, 206–207, 216–218, 224  
   late-, 206–207, 216–218, 225  
 Oligocephalus, 492  
 Olmstead, Richard G., *see* Scotland, Robert W., 539–547  
 Onagraceae, 347  
*Oncostylus*, 382  
   *cocklaynei*, 381  
   *leiospermus*, 381  
 One-tailed test, 28, 339  
 Ontogeny, 430, 515–527  
 Onycophora, 557  
*Opsacas minuta*, 316  
 Operational taxonomic units (OTU), 291, 620  
*Ophidiocephalus*, 757–758, 764, 767, 770–771  
   *taeniatus*, 757, 759  
*Ophiophagus*, 451  
   *hannah*, 441  
 Opilioacarid, 300, 309  
 Opilioacarida, 300  
 Opilioacariformes, 300  
 Opiliones, 557  
 Opossum, 285, 656  
 Opsin, 28–30  
 Optimal tree, 4, 8, 17, 20, 121, 128, 320, 341, 357, 696, 760, 850  
 Orangutan, 52–53, 794  
 Orchidaceae, 346  
*Oreamnos*, 225  
*Oreocalamus*, 447, 451, 457  
   *hanitschi*, 440  
*Oreotragus*, 221  
 Ornithodorinae, 300  
*Ornithorhynchus anatinus*, 285  
*Oropsylla silantiewi*, 187  
*Orsonwelles*, 70–88, 103, 833  
   *ambersonorum*, 73, 84, 88  
   *arcanus*, 73, 79, 84, 88  
   *bellum*, 71, 73, 88  
   *calx*, 73, 84, 88  
   *falstaffius*, 73, 79, 84, 88  
   *graphicus*, 71, 73, 79, 84, 88  
   *indicium*, 71, 73, 79, 88  
   *macbeth*, 73, 77, 79, 84, 88  
   *malus*, 71–73, 77, 79, 81, 88  
   *othello*, 73, 77, 79, 84, 88  
   *polites*, 72–73, 79, 84, 88  
   *torosus*, 71, 76–77, 79, 81–82, 88  
   *ventus*, 73, 79, 88  
*Ortalis*,  
   *cinereiceps*, 388  
   *guttata*, 286  
 Orthoptera, 307  
*Orthotylus*, 103  
*Oryctolagus cuniculus*, 286, 289, 606  
 Osteoderms, 239–252, 253–255, 851–852  
*Osteolaemus*, 386, 391, 409  
   *tetraspis*, 388, 391, 405, 408–409, 415  
 Osteological characters, 760  
 Ostrich, 388  
 Otariidae, 846  
*Otobius megnini*, 300  
*Otospermophilus*, 197  
   *variegatus*, 189  
 Otters, 571–573, 590  
   Asian small-clawed, 573  
   Cape clawless, 573  
   Eurasian, 573  
   giant, 573  
   marine, 573  
   Neotropical, 573  
   North American, 573  
   river, 577, 590  
   sea, 573  
   spotted-necked, 573  
*Ourebia ourebi*, 221  
 Outgroup, 9, 27, 39, 48, 52, 56, 60–61, 81–82, 88, 89, 92, 94, 96, 99, 102, 189, 192, 196, 205, 229–230, 232, 235, 237, 298, 301, 309, 386–387, 391–392, 404, 415, 443, 446, 463–464, 557, 574, 576, 618, 620–622, 660–661, 674, 707, 756–757, 762, 764, 767, 770–771, 775, 798–799, 815, 821, 826–827  
 Outgroup misplacement and phylogenetic inaccuracy under a molecular clock—a simulation study, B. R. Holland, D. Penny, and M. D. Hendy, 229–238  
*Ovibos*, 225  
*Ovis*, 209, 215, 218, 225  
   *aries*, 210, 212  
 Owl monkeys, 738  
 Oxelman, Bengt, *see* Erixon, Per, 665–674  
*Oxylipeurus chiniri*, 39  
  
*Pachygaster leachii*, 756  
 Paedomorphic salamanders, 503  
 Page, Roderic D. M., *see* Johnson, Kevin P., 37–47  
 Pairwise tests, 339, 344  
*Palaeobolbomyia*, 746, 750  
 Palaeoheterodonta, 559–560  
*Palaeoplatypygus*, 749  
 Paleocene, 551  
   late-, 550  
 Paleontological analysis, 605  
 Paleontology, 206–207, 265  
*Paleosuchus*, 391, 409  
   *palpebrosus*, 388, 405  
   *trigonatus*, 405  
*Pan*, 706  
 Pantophthalmidae, 756  
*Pantophthalmus* sp., 756  
*Papilio*, 589  
*Paradelma*, 758, 775  
   *orientalis*, 758, 761  
*Paradialictus*, 24, 26  
*Paralamyctes*, 559

- Paralictus, 24
- Paralinear distances (*see also* LogDet/paralinear distance), 287, 291
- Paraleucilla*, 314–315, 320, 322, 324–325, 332  
sp., 316
- Parallel evolution, 296, 307
- Parametric  
bootstrap, 18, 598, 667, 726, 757–780  
bootstrap test, 607, 802, 807, 809, 812  
test, 790
- Paraplatypeza atra*, 756
- Parasites, 26, 37–43, 45–46, 406, 735, 737–738, 740–742  
phylogeny, 740–741  
tree, 740, 742
- Parasitiformes, 299
- Parasitoids wasps, 430
- Parasphcodes, 24
- Paratomistoma*, 399
- Paratyphothorax*, 241, 243, 248–252
- Paraxonia, 853, 861–862
- Parazoanthus*, 317  
*axinellae*, 316
- Pareas*, 451  
*nuchalis*, 440, 446
- Pareatinae, 439–440, 447, 452, 455
- Parisitological characters, 738, 742
- Parrots, 549–553
- Parsimony (*see also* maximum parsimony), 19, 23, 39, 41, 76, 122, 124, 126, 131–132, 140, 147, 236, 258, 265, 335, 362–367, 386, 394, 396, 501, 556, 584, 604, 632, 641–648, 656, 696, 750, 761, 809, 820, 827, 832, 834–835, 841  
algorithms, 867  
analysis, 7, 26, 30, 42, 45, 70, 76, 79, 83, 249, 251, 255, 257, 260, 262, 271–280, 336, 377, 389–390, 392, 406, 412, 423, 506, 508, 530, 554, 571, 575, 583, 618, 620–621, 623, 629, 727, 764, 802, 804, 824  
analysis of endemcity (PAE), 271–280  
Camin–Sokal, 444, 446  
cladistic, 356, 365  
equally weighted, 620–621  
Fitch, 444, 446  
informative characters, 4, 323, 345, 446, 451, 529, 531, 773  
informative indels, 823  
informative sites, 28, 30, 613  
jackknife, 128  
jackknife support, 59, 557, 559  
linear, 342  
matrix, 241  
matrix-weighted, 623  
model, 361, 363  
permutation tail probability (PTP), 250, 252  
ratchet 368–373  
reconstruction, 629  
search, 368, 842  
squared-change, 337, 342  
support, 623  
trees, 9–10, 39, 42–43, 79, 286, 645, 762, 764, 771, 773, 802–804  
uniformative characters, 298  
weighted, 284
- Parsons, Thomas J., *see* Harshman, John, 386–402
- Partition analysis, 4
- Partitioned  
analysis, 396, 604–607  
branch support (PBS), 15–22, 76, 79, 307, 407, 409, 412  
likelihood analysis, 386–402  
likelihood support (PLS), 15–22,
- Partitioned likelihood support and the evaluation of data set conflict,  
M. S. Y. Lee and A. F. Hugall, 15–22
- Partition homogeneity test (PHT; *see also* incongruence length difference [ILD] test), 6, 15, 41–42, 45, 344, 347
- Passeriformes, 552
- Patagioenas*  
*fasciata*, 38  
*plumbea*, 38  
*speciosa*, 38  
*subvinacea*, 38
- PcP, 735–744
- p*-distances, 5
- Pecora, 206–207, 209, 213, 218, 221–222, 224–225
- Pedetes*, 613  
*capensis*, 606
- Pedetidae, 604–606, 610–611, 613–614
- Pelagomapouria*, 826, 829, 832–834
- Pelecorhynchidae, 753, 756
- Pelecorhynchus personatus*, 756
- Penny, D., *see* Holland, B. R., 229–238
- Peracarida, 430
- Percidae, 488
- Percina*, 491  
*caprodes*, 497, 500  
*nigrofasciata*, 491, 497, 500  
*ouachitae*, 497, 500  
*roanoka*, 491, 497–498, 500  
*sciera*, 491, 497, 500  
s.l., 494, 497
- Performance-based selection of likelihood models for phylogeny  
estimation, Vladimir Minin, Zaid Abdo, Paul Joyce, and Jack Sullivan, 674–683
- Pericharax*, 314–315, 332
- Periods,  
cenozoic, 206, 631, 746  
cretaceous, 23, 33, 403, 419, 550–552, 631, 746, 753, 861  
early Cretaceous, 548–549  
early Eocene, 795  
early Miocene, 206–207, 209, 217–218, 224–225  
early Oligocene, 206–207, 216–217, 224–225  
eocene, 222, 403, 419, 857–858  
jurassic, 746, 751, 753  
late Cretaceous, 419, 549–552  
late Eocene, 222, 224  
late Jurassic, 549, 746  
late Miocene, 218, 224  
late Oligocene, 225  
late Paleocene, 550  
late Pleistocene, 473  
late Triassic, 549, 745, 751, 754  
lower Cretaceous, 753  
lower Jurassic, 746, 749  
lower/middle Triassic, 746  
mesozoic, 549–553, 745–746  
mid-Cretaceous, 549, 552  
mid-Eocene, 218, 222, 224–225  
mid-Jurassic, 745  
mid-Miocene, 206–207, 209, 217–218, 224–225  
mid-Pleistocene, 198, 460, 473, 810  
mid-Tertiary, 549  
mid-Triassic, 548  
miocene, 207, 221, 451, 549, 551, 629, 761, 776, 808  
neogene, 206  
oligocene, 224–225, 795  
paleocene, 551  
pleistocene, 186, 198, 460–476, 777, 797, 807–808, 812  
pliocene, 224–225, 629  
plio-pleistocene, 225

- quaternary, 552  
 tertiary, 549–553, 746, 753  
 triassic, 239–252, 403, 749, 751  
 upper Cretaceous, 753  
 upper Jurassic, 753  
 upper Triassic, 753  
*Perissodactyla*, 850, 857–858  
 Permutation tail probabilities (PTPs), 250, 252  
*Petrobionia*, 314–315, 317, 320, 322–324, 328–329, 332–333  
   *massiliana*, 316  
*Petrobionidae*, 314  
*Petromarmota*, 186, 192–195, 197–198  
   *caligata*, 189  
   *flaviventris*, 189  
   *olympus*, 189, 193  
   *vancouverensis*, 189  
*Petrostoma*, 329  
*Phapitreron*  
   *amethystina*, 38  
   *leucotis*, 38  
 Phenotypes, 241, 349  
 Philippines, 794–819  
 Philosophy, 352–367  
   of science, 259–271, 352  
*Philothamnini*, 457  
*Phocidae*, 846–847  
*Phthiraptera*, 37–47  
*Phyllostomoidea*, 460  
 Phylogenesis, 520  
 Phylogenetically informative characters, 55–56, 826  
 Phylogenetic  
   accuracy, 121, 528–538  
   artifacts, 594  
   clade, 714  
   comparative method (PCM), 684–695  
   congruence, 165  
   conservatism, 1  
   data, 89, 248–249, 314, 649, 724, 726, 745, 747  
   distance, 491  
   effect, 488–500, 684, 686, 692, 694  
   eigenvector regression (PVR), 694  
   error, 119, 121, 124–125  
   estimates, 159, 284, 530, 802, 850  
   evidence, 503  
   framework, 311, 728  
   generalized least squares (PGLS),  
   history, 91, 131–132, 337, 348–349, 501, 589–590, 641, 745  
   hypothesis, 1, 55, 62, 212, 268, 283, 352, 354, 362–363, 401–406, 445,  
   477, 488, 554, 556–557, 571, 632, 672, 689, 693, 725–726, 728, 740,  
   742, 745, 764, 854, 858, 860–861  
   inference, 75, 180, 187, 296, 306, 335, 344, 352, 359, 368–373, 463, 511,  
   554, 612, 641, 696, 791  
   information, 96, 296, 311, 327, 339, 589, 686, 747, 761  
   level, 542  
   markers, 864  
   methods, 131, 229, 283, 285, 291, 293, 352, 358, 469, 480, 641–642,  
   665, 677  
   model, 133, 594, 649, 651, 654, 656, 661  
   patterns, 342–344, 348  
   reconstruction, 19, 39, 83, 287, 318, 375, 539–548, 571, 658, 665, 669,  
   671, 685, 724–729, 860–861, 864  
   relationships, 2, 23, 35, 71, 92, 102, 159, 179, 181, 186, 199, 213, 215,  
   220, 239, 245, 255, 265, 335–336, 347, 439, 444, 447, 451, 471, 477,  
   548, 554, 591, 623, 728, 745, 775, 797, 828  
   signal, 39, 55, 63, 70, 79, 83, 186, 197, 199, 328, 334, 371–372, 403, 412,  
   415–416, 445, 497, 511, 577, 581, 584, 591, 773, 853–855, 857, 860  
   species, 833  
   structure, 178, 181, 473, 686–687, 691  
   studies, 32, 110, 188, 374–375, 545, 757–758, 821–822  
   supertrees, 839–851  
   systematics, 260, 510, 735  
   taxonomy, 852  
   tests, 781  
   tools, 311  
   tree, 119, 121, 126, 71, 112, 131, 134–135, 244, 289–290, 359, 364–365,  
   427, 463, 515, 554–555, 669, 671, 685, 692, 715, 749, 760–761, 771,  
   791, 824, 847, 849  
   uncertainty, 39, 132, 488  
   utility, 27, 30, 32  
 Phylogenetic methods and Aetosaur interrelationships: a rejoinder,  
   Simon R. Harris, David J. Gower, and Mark Wilkinson, 851–852  
 Phylogenetic relationships among Calyptraeid gastropods and their  
   implications for the biogeography of marine speciation, Rachel  
   Collin, 618–640  
 Phylogenetic systematics and evolution of primate-derived  
   *Pneumocystis* based on mitochondrial or nuclear DNA  
   sequence comparison, Jean-Pierre Hugot, Christine  
   Demanche, Véronique Barriol, Eduardo Dei-Cas, and Jacques  
   Guillot, 735–744  
 Phylogenetics, 1–14, 48, 70–88, 95, 127, 136, 243, 247, 270, 334–351,  
   352–367, 386, 477–487, 515–527, 557, 565, 594–603, 655, 665,  
   782–783, 794, 847, 862  
   Bayesian, 48, 54, 89–109  
   molecular, 187, 283–295, 311, 715  
   vertebrate, 388  
 Phylogenetics of advanced snakes (Caenophidia) based on four  
   mitochondrial genes, Christopher M. R. Kelly, Nigel P. Barker,  
   and Martin H. Villet, 439–459  
 Phylogenetics of fanged frogs: testing biogeographical hypotheses at  
   the interface of the Asian and Australian faunal zones, Ben J.  
   Evans, Rafe M. Brown, Jimmy A. McGuire, Jatna Supriatna,  
   Noviar Andayani, Arvin Diesmos, Djoko Iskandar, Don J.  
   Melnick, and David C. Cannatella, 794–823  
 Phylogenomics, 119–124  
 Phylogeny, 8–9, 23–36, 37–47, 48–54, 57, 60–61, 63, 66, 89, 92, 111, 114,  
   121, 133, 136, 139, 152, 159–185, 186–205, 206–228, 229, 239,  
   253–255, 264, 272, 280, 296–310, 311–333, 334–335, 345, 348, 368,  
   374–385, 386–402, 430, 460–461, 471, 488, 493, 497–498, 501–514,  
   515, 520–521, 525–526, 539, 543, 548, 571–593, 604–617, 632, 645,  
   647, 649–664, 665–673, 674–683, 687, 692–693, 696–704, 714, 724,  
   726, 728, 735, 737, 740, 751, 757–780, 792, 798, 801–802, 820, 855,  
   864  
   aetosaur, 852  
   cetacean, 854  
   chloroplast, 375  
   estimates, 423–428, 674, 677, 682  
   fly, 746  
   gene, 374  
   host, 740, 742  
   hypotheses, 738  
   mammalian, 857  
   molecular, 37–47, 206, 545, 781, 832  
   morphological, 206  
   muroid, 613  
   parasite, 740–741  
   *Pneumocystis*, 737, 740  
   reconstruction, 264, 349, 501, 511, 542–543, 545, 586  
   rodent, 613  
   tetrapod, 283–295  
   whale, 853  
 Phylogeny and evolution of Calcareous sponges: monophyly of  
   *Calcinea* and *Calcaronea*, high level of morphological

- homoplasy, and the primitive nature of axial symmetry, Michael Manuel, Carole Borchellini, Eliane Alivon, Yannick Le Parco, Jean Vacelet, and Nicole Boury-Esnault, 311–333
- Phylogeny of eusocial *Lasioglossum* reveals multiple losses of eusociality within a primitively eusocial clade of bees (Hymenoptera: Halictidae), Bryan N. Danforth, Lindsay Conway, and Shuqing Ji, 23–36
- Phylogeny reconstruction: the role of morphology, Robert W. Scotland, Richard G. Olmstead, and Jonathan R. Bennett, 539–547
- Phylogeographic  
analysis, 460  
structure, 460–476
- Phylogeography, 92, 801, 812
- Phylogram, 100, 140, 621
- Phymaturus indistinctus*, 160, 164
- Physeter*, 706, 712
- Phytosaurs, 253
- Pianka, Eric R., *see* Jennings, W. Bryan, 757–780
- Pichia anomala*, 316
- Picoides pubescens*, 286
- Pigeons, 37, 41, 45  
New Zealand, 45
- Pigs, 854
- Pinworm, 742
- Pithecia*, 737, 740, 742  
*pithecia*, 736
- Pityohyphantes*, 77  
*costatus*, 73, 88
- Placental mammals, 591
- Placozoa, 31
- Plagithmysus*, 89
- Plankton, 618
- Plants, 89, 106, 335, 347, 517, 541, 696, 746, 794, 820  
flowering, 375, 518, 753, 820  
seed, 542, 781
- Plasmid DNA, 316
- Platodes, 520
- Platymantinae, 794
- Platypezidae, 756
- Platypodid beetles, 23
- Platyrrhini, 738, 742, 735, 737, 741
- Plecoptera, 106
- Plectroninia*, 314–315, 317, 323, 328–329, 332  
*halli*, 329
- Pleistocene, 186, 198, 777, 797, 807–808, 812  
divergence, 460–476  
late-, 473  
mid-, 198, 460, 473, 810
- Plesiometacarpalia, 207, 215
- Plethodontid salamanders, 510
- Pletholax*  
*gracilis*, 757, 759  
*hortulanus*, 761
- Pliocene, 629, 629
- Plio-pleistocene, 225
- Pneumocystis*, 735–744  
*carinii*, 735–736  
*carinii aotus*, 736, 738, 742  
*carinii callimico*, 736, 738  
*carinii callithrix*, 736, 738, 740  
*carinii fascicularis*, 736  
*carinii fuscicollis*, 736, 738  
*carinii geoffroyi*, 736, 738, 740  
*carinii griseus*, 736  
*carinii hamlyni*, 736  
*carinii imperator*, 736, 738  
*carinii macaco*, 736  
*carinii midas*, 736, 738  
*carinii mulatta 1*, 736  
*carinii mulatta 2*, 736  
*carinii muris*, 736  
*carinii nemestrina*, 736  
*carinii nictitans*, 736  
*carinii nigroviridis*, 736  
*carinii oedipus*, 736  
*carinii pithecia*, 736, 738, 742  
*carinii sciureus*, 736, 738, 742  
DNA, 736  
genes, 742  
genotypes, 735  
*jiroveci*, 736  
phylogeny, 737, 740  
pneumonia (PcP), 735–744  
spp., 735, 738, 742
- Poe, Steven, Evolution of the strategy of long-branch subdivision to improve the accuracy of phylogenetic methods, 423–427
- Poe, Steven, *see* de Queiroz, Kevin, 352–367
- Poisson  
distribution, 133  
process model, 134
- Polhemus, Dan, *see* Jordan, Steve, 89–109
- Polinices didyma*, 640
- Pollock, David D., *see* Hillis, David M., 124–126
- Polychaetes, 430
- Polymerase chain reaction (PCR), 26, 39, 74, 94, 301, 316, 376, 383, 389, 404, 571, 574, 591, 606, 620, 736, 738, 758, 823  
amplification, 2–3, 161, 375, 389, 736, 747  
recombination, 384
- Polymorphic characters, 505, 833
- Pongo*, 706
- Pontederia*  
*cordata* var. *cordata*, 154, 156  
*cordata* var. *lancifolia*, 154, 156  
*cordata* var. *ovalis*, 154, 156  
*rotundifolia*, 154, 156  
*sagittata*, 154, 156
- Pontederiaceae, 139–140, 143, 147, 154, 156
- Popper and systematics, Olivier Riappel, 259–270
- Popper, Karl, 259–271, 352–367
- Popper's degree of corroboration, 352, 355, 360, 363, 366
- Porifera, 311–333
- Potent antiretroviral therapy (PART), 660–661
- Prairie dog, 186,
- Prestosuchidae, 252
- Priapulus caudatus*, 316
- Price, Samantha E., *see* Bininda-Emonds, Olaf R. P., 724–729
- Primary characters, 725–726
- Primates, 52–53, 57, 549, 606, 707–708, 735–744
- Principle component analysis (PCA), 687
- Principle coordinates analysis, 860
- Pristichampsus*, 409
- Probability, 352–367
- Procervulus*, 224
- Procrustes, 66–69  
distance, 67, 190, 192, 493  
generalized analysis, 66, 68  
geometry, 67–68
- Procyonidae, 573–574, 846
- Procyoninae, 573
- Procyon lotor*, 573–574

- Progressive rearing, 1–14  
 Prokaryotes, 658–660  
*Propithecus*, 706  
 Prosobranchia, 328  
 Prostriata, 296, 300, 304, 307  
 Protein-coding, 391  
   genes, 23, 39, 74, 94, 297–298, 307, 358, 396, 405, 445, 460, 471, 506,  
   604, 609, 612, 656, 682, 705–706  
   regions, 52, 165  
 Protein evolution, 602  
 Protists, 429–430  
*Protragocerus labidotus*, 221  
 Prunoideae, 378–379, 382  
*psaA*, 785, 787, 791  
*psaB*, 785, 787–788, 791  
 Psammophiinae, 439–440, 452, 455  
*Psammophis*, 451  
   *condenarus*, 441  
   *mossambicus*, 441, 459  
*Psammophylax*, 451  
   *variabilis*, 441, 459  
*Pseudagrion*, 91, 94, 102  
   *civicum*, 94  
   *pacificum*, 94  
   *palauense*, 94  
*Pseudemys scripta*, 286–287  
*Pseudochilalictus*, 24  
 Pseudoboini, 456  
 Pseudoreplicate, 55–65  
 Pseudoxyrophiinae, 439, 441, 443, 452, 455–456  
 Psittacidae, 551  
 Psittiformes, 551  
 Psychodomorpha, 756  
*Psychomyia*,  
*Psychotria*, 820–841  
   *cadigiensis*, 821–822  
   *fauriei*, 822, 826, 829, 833–834  
   *grandiflora*, 822, 826, 828–829, 832, 834  
   *greentwelliae*, 820, 822–823, 825–827, 829, 832–834  
   *hathewayi*, 822, 826, 829, 833–834  
   *hawaiiensis* subsp. *hawaiiensis*, 829  
   *hawaiiensis* var. *hawaiiensis*, 822, 829, 833  
   *hawaiiensis* var. *hillebrandii*, 822–823, 829  
   *hexandra*, 822, 828–829, 832, 834  
   *hexandra* subsp. *O'ahuensis*, 822  
   *hobdyi*, 822, 828–829, 832, 834  
   *hombroiana*, 821–822  
   *kaduana*, 822, 829, 831, 833  
   *luzionensis*, 821–822  
   *mariniana*, 822, 825, 827, 829, 832–834  
   *mauiensis*, 822, 829, 833  
   *pickeringii*, 821–822  
   sp. Fiji, 821–822  
   sp. Guam, 822  
   sp. Tinian Is., 821  
   *tahitiensis*, 821–822, 826  
   *wawrae*, 822, 829, 834  
 Pteriomorpha, 561  
*Pteronura*, 590  
   *brasiliensis*, 581, 583, 589–590  
 Pterygota, 328  
*Ptilinopus occipitalis*, 38  
*Ptiolina fasciata*, 756  
 Punctuational evolution, 831  
 Pupal characters, 8  
 Purvis, Andy, *see* Bininda-Emonds, Olaf R. P., 724–729  
 P-values, 18, 22, 28, 99, 132, 137, 147, 156–157, 190, 192, 273, 279, 345,  
   394–395, 406, 425, 598–600, 692, 722, 761, 770, 783–785, 787–788,  
   790–791  
   adjustment, 781–793  
 Pycnogonida, 557  
 Pygopodidae, 757–780  
 Pygopodid  
   lizards, 757–780  
   phylogeny, 758, 764  
   tree, 757, 760, 770  
*Pygopus*, 757–758, 762, 764, 767, 770–771, 775  
   *nigriceps*, 759–761, 775  
   (*Paradelma*) *orientalis*, 759  
   *schraderi*, 758  
   *stealescottii*, 758  
 Pythonidae, 440  
*Python reticulatus*, 440  
 Quail, 551  
 Qualitative support (QS) index, 839, 841, 844, 847  
*Quamoclidion*, 336  
 Quartet puzzling (QP) values, 558  
 Quaternary, 552  
 Rabbits, 289  
 Raccoon, 573  
 RAG-1, 405, 408  
 RAG-2, 604, 606–610, 613–614  
 Raguso, Robert A., *see* Levin, Rachel A., 334–351  
*Rana*  
   *nigromaculata*, 798  
   *signata*, 810  
   *vittigera*, 815  
 Random  
   generation, 110–118  
   trees, 30, 115, 445, 681  
*Rangifer*, 209, 212, 215, 218–219  
   *tarandus*, 210  
*Rangiferini*, 209  
*Ranodon sibiricus*, 286  
 Ranunculaceae, 347  
*Ranunculus*, 347  
 Rare genomic changes, 296  
 Rate  
   distribution, 594–603  
   homogeneity model, 463  
   of evolution, 602, 641, 646–647, 677, 746, 753, 833  
 Rates-across-sites model, 595–596  
 Ratite, 290  
   birds, 549–553  
 Rats, 290  
*Rattus norvegicus*, 286, 606, 736  
*Rauisuchia*, 241–243, 251  
*rbcL*, 140, 336, 379, 696–704  
 rDNA, 405, 408, 808, 820  
 Recapitulation, 515–527  
 Recognition, 110–118  
 Reconciliation analysis, 39, 42  
 Recursion, 110–118  
 Reconstructing ancestral patterns of colonization and dispersal in the  
   Hawaiian understory tree genus *Psychotria* (Rubiaceae): a  
   comparison of parsimony and likelihood approaches, Molly  
   Nepokroeff, Kenneth J. Sytsma, Warren L. Wagner, and  
   Elizabeth A. Zimmer, 820–841  
 RDPII project, 696–704  
 Red deer, 210

- Redondasuchus*, 241–243, 248–252  
 Red panda, 846  
 Reductive characters, 245  
*Redunca*, 209, 212, 215  
     *fulvorufula*, 210  
 Reduncini, 209–210  
 Redundancy analysis (RDA), 687–689, 693  
 Reed, David L., *see* Cummings, Michael P., 477–487  
 Regression, 66–69  
     analysis, 68  
     model, 684, 686  
 Regularia, 328  
 Reindeer, 210  
*Reithrodontomys sumichrasti*, 677  
 Relative warp analysis (RWA), 198  
 Reliability of Bayesian posterior possibilities and bootstrap frequencies in phylogenetics, Per Erixon, Bodil Svennblad, Tom Britton, and Bengt Oxelman, 665–673  
 RELL bootstrapping, 390  
 Remipedia, 557  
 Reptiles, 524  
 Reptilia, 239, 253  
 Rescaled consistency index, 762, 764  
 Retention index, 3, 5–6, 10, 28, 56, 76, 217, 304, 339, 345–346, 348, 577–578, 581–583, 762, 764, 826  
 Reticulate evolution, 374–385  
 Reweighted characters, 318, 327, 371  
 Rhagionidae, 746, 756  
*Rhagoletis*, 754  
 Rhamnaceae, 375  
*Rhammus*, 378–379  
     *cathartica*, 377  
 Rhamphiphis, 451  
     *acutus*, 441, 459  
     *oxyrhynchus*, 441  
*Rhamphotyphlops braminus*, 440  
*Rhea americana*, 550  
 Rheas, 550  
*Rhingia nasica*, 756  
 Rhinoceros, 706–708, 794  
*Rhipicentor*, 305–306  
     *nuttalli*, 299  
 Rhipicephalinae, 297–298, 305–307  
     s.l., 296, 299, 304–305, 307, 309  
*Rhipicephalus*, 299, 306  
     *appendiculatus*, 299, 306, 310  
     *compositus*, 299  
     *evertsi*, 299, 310  
     *maculatus*, 299  
     *pravus*, 299, 310  
     *pulchellus*, 299, 306, 310  
     *pumilio*, 306  
     *punctatus*, 299  
     *sanguineus*, 299, 306, 310  
     *simus*, 299  
     *turanicus*, 299, 306  
     *zambeziensis*, 299  
     *zumpti*, 299  
*Rhizomys*, 613  
     *pruinus*, 606  
 Rhynosaurs, 253  
 Rieppel, Olivier, Popper and systematics, 259–270  
 Ringtail, 573  
 Rivulidae, 548, 552  
*Rivulus marmoratus*, 549  
 RNA, 555, 610  
     mitochondrial, 445  
     polymerase II, 557  
     secondary structure, 283–295  
     sequencing, 49, 651  
 Rock squirrel, 194, 197  
 Rodent, 656, 679–680  
     Holarctic, 186  
     phylogeny, 613  
     tree, 615  
 Rodentia, 186, 604–617  
 Rodman, James E. and Jeannine H. Cody, Taxonomic impediment overcome: NSF's Partnerships for Enhancing Expertise in Taxonomy (PEET) as a model, 428–435  
 Roger, Andrew J., *see* Susko, Edward, 594–603  
 Rohlf, F. James and Fred Bookstein, Computing the uniform component of shape variation, 66–69  
 Rokas, Antonis, *see* Cummings, Michael P., 477–487  
 Rooted  
     duplication tree (RDT), 110–111, 113, 115  
     tree, 865  
 Rooting, 386–402  
 Roots of phylogeny: how did Haeckel build his trees?, Benoit Dayrat, 515–527  
*Rosa*, 375  
     *multiflora*, 375–377  
 Rosaceae, 374–377, 379, 382  
 Rosenberg, Michael S. and Sudhir Kumar, Taxon sampling, bioinformatics, and phylogenomics, 119–123  
 Rosoideae, 378–379  
     rRNA, 131, 283–285, 291, 293, 297, 307, 615  
 Rubiaceae, 820  
*Rubus*, 375  
     *odoratus*, 376–377  
 Ruminantia, 206–228  
*Rupicapra rupicapra*, 221  
 Rutaceae, 347  
  
 Sable antelope, 210  
*Saccharomyces cerevisiae*, 316  
*Saguinus*, 740, 742  
     *fuscicollis*, 736–737  
     *imperator*, 736  
     *midas*, 736, 738  
     *oedipus*, 736  
*Saimiri*, 740, 742  
     *sciureus*, 736  
 Salamanders, 287, 501–514  
     cave, 501  
     hemidactyliine, 509  
     paedomorphic, 503  
     plethodontid, 510  
 Sampling design, 159–185  
 Sampling strategies for delimiting species: genes, individuals, and populations in the *Liolaemus elongatus-kriegi* complex (Squamata: Liolaemidae) in Andean–Patagonian South America, Mariana Morando, Luciano J. Avila, and Jack W. Sites Jr., 159–185  
 Sandvik, Hanno, Genes, categories, and species: the evolutionary and cognitive causes of the species problem (rev.), 565–567  
 Sarcoscyphinae, 430  
*Sarona*, 833  
 Savage–Dickey ration, 48, 50, 53  
 Scale, 271–280  
     of being, 515–527  
*Sceloporus jarrovi*, 160  
 Scenopinidae, 750, 756

- Scent, 334–351
- Schiedea*, 820, 832
- Schistosoma*, 307
- Schizophora, 746, 749–751, 753–754
- Schwarz, Michael P., Nicholas J. Bull, and Steven J. B. Cooper,  
Molecular phylogenetics of Allodapine bees, with implications  
for the evolution of sociality and progressive rearing, 1–14
- Scincidae, 757
- Sciuridae, 186, 605–606, 608, 614–615
- Sciurid convergence, 186–205
- Sciurids, 188, 197
- Sciurini, 189
- Sciuroidea, 604–606, 608–610, 613, 615
- Sciuromorpha, 605, 614
- Sciurus*  
*infuscatus*, 205  
*vulgaris*, 189, 205
- Scobius*, 271–280, 717–723  
*aciculatifrons*, 273  
*cognatus*, 273  
*griseus*, 273, 275  
*horni*, 275  
*obesus*, 275  
*oneill*, 275  
*pullus*, 275  
*viridis*, 275
- Scolecophidia, 440
- Scolopendra cingulata*, 316
- Scorpiones, 300, 556–557
- Scorpionoidea, 556
- Scotland, Robert W., Richard G. Olmstead, and Jonathan R. Bennett,  
Phylogeny reconstruction: the role of morphology, 539–547
- Scypha*, 325  
*ciliata*, 317
- Sea anemones, 430
- Seastar, 139–140, 143
- Sea urchins  
*Echinometra*, 631
- Seed plants, 542, 781
- Selenodontia, 221
- Sellalictus*, 24, 26, 30
- Semicassis pyrum*, 640
- Sensitivity analysis, 554–564
- Sequence analysis, 737
- Sequence-tagged sites, 571–593
- Serinus canaria*, 389
- Sex ratio, 24, 33
- Shape statistics, 66–69
- Sheep, 206, 210, 854, 857
- Shell characters, 619, 623
- Shimodaira–Hasegawa test, 15–22, 96, 98, 212, 216, 221, 444–445, 464,  
468, 504, 508, 781–793
- Short-tailed bat, 460
- Shrimp, 23
- Synalpheus*, 631
- Sicista*, 614  
*tianshanica*, 606
- Sieversia*, 374
- Sigapatella*, 619, 632, 639  
*novaezealandiae*, 639  
*terraenovae*, 639
- Significance test, 781–793
- Silicispongia, 320
- Silverswords, 89
- Simimeryx*, 222
- Simon, Chris, *see* Jordan, Steve, 89–109
- Simple, fast, and accurate algorithm to estimate large phylogenies by  
maximum likelihood, Stéphane Guindon and Olivier Gascuel,  
696–704
- Simulation (*see also* computer simulation and Monte Carlo  
simulation), 423–428, 665–673
- Single-copy genes, 375
- Single-gene tree, 20
- Single-valve decomposition (SVD), 68–69
- Sinsheimer, Janet S., *see* Suchard, Marc A., 48–54, 649–664
- Siphopatella*, 619, 623, 639  
*walshi*, 623, 639
- Sites-specific rates (SSR)  
analysis, 612  
model, 4, 8, 26–28, 30, 463, 466–468, 610, 612, 674  
tree, 610–611
- Sites, Jack W., Jr., *see* Morando, Mariana, 159–185
- Skeletal characters, 199, 222, 313, 403
- Skunks, 572–573
- Smedmark, Jenny E. E., Torsten Eriksson, Rodger C. Evans, and  
Christopher S. Campbell, Ancient Allopolyploid speciation in  
Geinae (Rosaceae): evidence from nuclear granule-bound  
starch synthase (GBSSI) gene sequences, 374–385
- Snails, 70
- Snakes, 286–287, 456  
African, 456  
advanced, 439–459  
colubrid, 758  
Madagascan, 456
- Snipe flies, 745–746
- Snout characters, 416
- Social  
behavior, 23–36  
evolution, 1–14, 23–36
- Soft ticks, 300
- Solanaceae, 347
- Soldier flies, 746
- Soleneiscidae, 314
- Soleneiscus*, 314–315, 317, 322, 329, 332–333  
*radovani*, 316
- Sordariales, 430
- Source trees, 727, 840–844, 846
- South Africa, 717–723
- Southern cassowary, 388
- Spalax*, 613  
*zemni*, 606
- Spearman's rank correlation test, 339, 346
- Speciation, 70–88
- Speciation on a conveyor belt: sequential colonization of the Hawaiian  
islands by *Orsonwelles* spider (Araneae, Linyphiidae), Gustavo  
Hormiga, Miquel Arnedo, and Rosemary G. Gillespie, 70–88
- Species  
boundaries, 159–185  
radiations, 89–109  
trees, 63, 180, 725, 727
- Spermophilus*, 189, 194, 197  
*beldingi*, 189, 204  
*citellus*, 189, 204  
*eversmanni*, 205  
*grammurus*, 204  
*gravojerici*, 204  
*karamani*, 204  
*richardsoni*, 189, 204  
*tridecemlineatus*, 606  
*undulatus*, 189, 204–205  
*variegatus*, 194, 197, 204
- Sphécodogastra*, 24, 32

- Sphenodon punctatus*, 286  
 Spiders, 56, 58, 60, 62, 70–88, 300, 430, 833, 557  
   ground, 430  
   *orsonwelles*, 70–88, 833  
   *tetragnathid*, 70, 105  
 Sponges, 525  
   asconoid, 313, 332–333  
   calcareous, 311, 320, 328, 330, 332–333  
   leuconoid, 313, 325, 329  
   syconoid, 313, 329, 332  
   sylllebid, 313  
 Spongiae, 520  
*Spongilla*, 317  
   *lacustris*, 316  
 Squamata, 159  
 Squared-change parsimony, 337, 342  
 Squirrel monkey, 52–53  
 Squirrels,  
   ground, 186, 197  
   rock, 194, 197  
   terrestrial, 187–188  
   tree, 188, 197  
 Stability, 55–65  
   analysis, 554–564  
 Stability in phylogenetic formulations and its relationship to nodal support, Gonzalo Giribet, 554–564  
*Stagonolepis*, 247–248  
   *robertsoni*, 241, 243, 250–251  
   *wellesi*, 241, 243, 250–251, 254  
 Stalk-eyed flies, 32  
 Staphylinidae, 430  
 Star  
   topology analysis, 481  
   tree, 236, 236  
 State (see character state)  
 Statistical  
   analysis, 131, 847  
   test, 197  
 Staurorrhaphidae, 314, 328, 333  
*Stenomphrale teutankameni*, 756  
*Stephanocemas*, 224  
 Strepsirrhine, 711–713  
 Stochastic mapping of morphological characters, John P. Huelsenbeck, Rasmus Nielsen, and Jonathan P. Bollback, 131–158  
 Stochastic model, 152, 705, 761, 833  
 Stratiomyidae, 756  
 Stratiomyomorpha, 746, 750–751, 756  
*Straussia*, 820, 826, 828–829, 832–833  
 Strepsirhini, 738  
*Streptopelia*  
   *capicola*, 38, 46  
   *decaocto*, 38  
   *senegalensis*, 38, 46  
   *vinacea*, 38, 46  
 Strict component consensus (SCC), 241, 243, 248, 250  
   tree, 251, 532–533, 535  
 Strict consensus, 406  
   tree, 57–58, 61, 323, 339, 344, 737, 826–827  
 Strict reduced consensus (SRC) method, 240, 243, 247–248, 250  
   tree, 250  
*Strobilanthes*, 543  
*Struthio camelus*, 388, 405  
 Struthioniformes, 551  
*Sturnira lilium*, 472  
*Stylipus*, 383  
*Suberites*, 317  
   *ficus*, 316  
 Substitution  
   model, 3, 140, 293, 371, 463, 577  
   rates, 471  
 Suchard, Marc A., Christina M. R. Kitchen, Janet S. Sinsheimer, and Robert E. Weiss, Hierarchical phylogenetic models for analyzing multipartite sequence data, 649–664  
 Suchard, Marc A., Robert E. Weiss, and Janet S. Sinsheimer, Testing a molecular clock without an outgroup: derivations of induced priors on branch-length restrictions in a Bayesian framework, 48–54  
*Sudila*, 24, 32  
 Suine artiodactylans, 854  
 Sulawesi, 794–819  
 Sullivan, Jack, see Minin, Vladimir, 674–683  
 Summary characters, 337, 342  
 Sum of squared deviations (SSD),  
 Supermatrix, 724–729  
   analysis, 724, 726, 728, 853  
 Supertree, 439–459, 528–538, 724–729, 865  
   analysis, 725–726, 728, 853  
   carnivore, 845  
   clade, 840–841  
   consensus, 440, 447  
   construction, 728, 839  
   MRP, 439, 444  
   phylogenetic, 839–851  
   support, 55–65, 665–673, 839–851  
 Supertrees are a necessary not-so-evil: a comment on Gatesy et al., Olaf R. P. Bininda-Emonds, Kate E. Jones, Samantha A. Price, Richard Grenyer, Marcel Cardillo, Michael Habib, Andy Purvis, and John L. Gittleman, 724–729  
 Supriatna, Jatna, see Evans, Ben J., 794–823  
 Susko, Edward, Chris Field, Christian Blouin, and Andrew J. Roger, Estimation of rates-across-sites distributions in phylogenetic substitution models, 594–603  
 Svennblad, Bodil, see Erixon, Per, 665–674  
 Swallowtail butterflies, 589  
 Swofford-Olsen-Waddell-Hillis test (SOWH), 607, 611, 615  
 Sycetta, 314–315, 332  
 Sycettidae, 314  
*Sycettusa*, 314–315, 320, 322–324, 328, 332–333  
   sp., 316  
*Sycon*, 311, 313–315, 317, 320, 323, 325, 329, 332  
   *calcaravis*, 316–317, 323, 329  
   *ciliatum*, 316–317, 322–323, 328–329  
   *ensiferum*, 333  
   *raphanus*, 316–317, 322–325, 329–330  
   spp., 320  
*Syconessa*, 314–315, 332–333  
*Sylvicola alternatus*, 756  
 Symbionts, 735, 743  
 Symmetric-difference tree, 463  
 Sympatric  
   lineages, 46–476  
   speciation, 618–640  
*Symphoromyia hirta*, 756  
 Symphyla, 557  
*Synalpheus shrimp*, 631  
*Synechocystis*, 659  
 Syrphidae, 756  
 Systematic characters, 243  
 Systematics, 23–36, 55, 259–271, 403, 430, 515–527, 539, 565, 632, 674, 853



- molecular, 430, 501–514, 571–572, 591, 745–756, 820–841  
 phylogenetic, 510  
 Systematics of the lizard family Pygopodidae with implications for the diversification of Australian temperate biotas, W. Bryan Jennings, Eric R. Pianka, and Stephen Donnellan, 757–780  
 Systematic utility of floral and vegetative fragrance in two genera of Nyctaginaceae, Rachel A. Levin, Lucinda A. McDade, and Robert A. Raguso, 334–351  
 Sytsma, Kenneth J., *see* Nepokroeff, Molly, 820–841
- Tabanidae, 746, 753–754, 756  
 Tabanomorpha, 745–746, 750–751, 756  
*Tabanus*, 754  
   *rufograter*, 756  
*Taihangia rupestris*, 382  
 Tamiini, 189, 194  
*Tamias*, 189, 205  
   *sibiricus*, 205  
   *striatus*, 189, 205  
*Tamiasciurus hudsonicus*, 606  
 Tamura and Nei model, 703  
 Tandem duplication trees, 110–118  
 Tapirs, 857  
 Tarsier, 52–53  
 Taxic-homology, 539–548  
*Taxidea*, 590  
   *taxus*, 571–573, 581  
 Taxidiinae, 571–573  
 Taxonomic  
   congruence, 853, 862  
   impediment, 428–435  
   sampling, 832  
   training, 428–435  
 Taxonomic impediment overcome: NSF's Partnerships for Enhancing Expertise in Taxonomy (PEET) as a model, James E. Rodman and Jeannine H. Cody, 428–435  
 Taxonomy, 330, 390, 474, 539–548  
   Calyptraeid, 619  
 Taxon sampling, 71, 119–124, 124–126, 207, 306–307, 423, 442, 446, 451, 539, 542–543, 614, 619, 632–633, 641–642, 644–645, 802, 853  
 Taxon sampling, bioinformatics, and phylogenomics, Michael S. Rosenberg and Sudhir Kumar, 119–123  
 Tayra, 573  
*Tegula*, 619, 631, 633  
 Teiidae, 689  
*Teinobasis*, 91, 94, 96  
   *palauensis*, 102  
   *rufithorax*, 102  
 Telemetacarpalia, 207, 215, 219  
 Templeton tests, 15–22, 339, 344–345  
 Termites, 23, 33  
 Terrestrial squirrels, 187–188  
 Tertiary, 549–553, 746, 753  
   mid-, 549  
 Testing a molecular clock without an outgroup: derivations of induced priors on branch-length restrictions in a Bayesian framework, Marc A. Suchard, Robert E. Weiss, and Janet S. Sinsheimer, 48–54  
 Tests  
   approximately unbiased, 781–793  
   Bayesian, 607, 615  
   chi-square, 307, 395, 397–398, 607  
   goodness-of-fit, 464, 471, 674  
   hypothesis, 48–54, 781–793  
   incongruence length difference (ILD) (see also partition homogeneity), 3, 11, 15, 26, 28, 75–76, 418, 467, 604, 607–609, 613, 622, 773, 853–855, 860, 862  
   Kishino–Hasegawa, 4, 10, 15–22, 212, 216, 390, 392, 394–396, 398, 445, 504, 781  
   Kolmogorov–Smirnov, 190  
   likelihood ratio (LRT), 41–42, 48, 54, 63, 95, 352, 363–364, 377, 379, 390, 394, 445, 575, 580, 598, 600, 604–617, 621, 655, 674–683, 714, 801, 825, 849  
   likelihood weight, 18–19, 22  
   log-likelihood ratio, 3–4, 377, 379  
   Mantel, 491  
   maximum likelihood, 614  
   Monte Carlo randomization, 684  
   nonparametric, 781  
   nonparametric signed-rank, 16  
   one-tailed, 28, 339  
   pairwise, 339, 344  
   parametric bootstrap, 607, 802, 807, 809, 812  
   parametric, 790  
   partition homogeneity (see also incongruence length difference), 6, 15, 41–42, 45, 344, 347  
   phylogenetic, 781  
   Shimodaira–Hasegawa, 15–22, 96, 98, 212, 216, 221, 444–445, 464, 468, 504, 508, 781–793  
   significance, 781–793  
   Spearman's rank correlation, 339, 346  
   statistical, 197  
   Swofford–Olsen–Waddell–Hillis, 607, 611, 615  
   Templeton, 15–22, 339, 344–345  
   topological ILD, 75–77  
   two-tailed, 339  
   Wilcoxon rank sum, 337, 345  
   Wilcoxon signed rank, 406, 668, 857  
*Tetilla japonica*, 316  
*Tetracerus*, 221  
   *quadricornis*, 221  
 Tetraconata, 557  
*Tetragnatha*, 103  
 Tetragnathidae, 56–57  
 Tetragnathid spiders, 70, 105  
*Tetramolopium*, 820  
 Tetrphyllidea, 430  
 Tetrapods, 283, 285  
   evolution,  
   phylogeny, 283–295  
*Thamnophiini*, 447  
*Thamnophis*, 447, 451  
   *butleri*, 440  
   *elegans*, 440  
 Therevidae, 430, 750, 756  
 Thin-plate spline, 189, 192–193, 488–500  
*Thomomys bottae*, 606  
*Thoracosaurus*, 398, 401, 417–418  
 Thorne, Jeffrey L., *see* Wiegmann, Brian M., 745–756  
 Three-item statements, 255–259  
 Three-parameter TN92 model, 293  
*Thrincolhalictus*, 24  
 Thrips, 23  
 Ticks, 296–310  
   hard, 296–298, 300–301, 304, 309  
   metastriate, 297, 306  
   prostriate, 297  
   rhypicephaline, 304, 306  
   soft, 300  
 Tigers, 794

- Time flies, a new molecular time-scale for Brachyceran fly evolution without a clock, Brian M. Wiegmann, David K. Yeates, Jeffrey L. Thorne, and Hirohisa Kishino, 745–756
- Time-homogeneous model, 647
- Tipula (Platytipula) paterifera*, 756
- Tipulidae, 756
- Tipulomorpha, 756
- Toxus nasutus*, 286
- Tomistoma*, 386, 391–392, 394, 396–399  
*cairensis*, 405  
*schlegelii*, 386, 388, 403, 405–406, 408–409, 412, 415–419
- Tomistominae, 403, 405, 416–418
- Topological ILD test, 75–77
- Tortricine moths, 430
- Total evidence, 55–65, 864  
 analysis, 839
- Total evidence versus relative evidence: a response to O’Leary et al. (2003), Gavin J. P. Naylor and Dean C. Adams, 864–865
- Trachemys scripta*, 286
- Tragelaphini, 209–210
- Tragelaphus*, 209, 212, 219  
*imberbis*, 210
- Tragopan satyra*,  
 Tragulidae, 206–207, 209–210, 213, 222
- Tragulina, 206–207, 209, 218, 222
- Tragulus*, 206, 209, 212–213, 215, 220  
*javanicus*, 210  
*napu*, 210
- Transition/transversion  
 probabilities, 363  
 (TI:TV) ratio, 4, 140, 372, 390, 444–445, 467, 555–556, 559, 577, 650–651, 656, 700, 708–709, 727, 748, 760, 851
- Tree-bisect-reconnect (TBR), 120  
 branch-swapping, 39, 75, 166, 275, 318, 336, 377–378, 390, 407, 444–445, 463, 504, 506, 575, 607, 621–622, 666, 681, 748, 760, 801, 823–824
- Tree-construction analysis, 182
- Tree landscapes, 368–373
- Tree of Life, 431, 434, 525
- Tree squirrel, 188, 197
- Trees  
 Adams consensus, 463, 850  
 allozyme, 509  
 Bayesian, 30, 100, 167, 455, 457, 589, 750, 762, 764, 767, 771, 773, 802  
 Bayesian consensus, 622  
 best-fit, 4  
 bifurcating, 642  
 binary, 114  
 biochemical, 403  
 bootstrap, 251, 380–381, 451, 455, 465  
 bootstrap consensus, 609  
 burn-in, 607  
 canonical, 113, 115  
 clocklike, 233  
 combined data, 612  
 consensus, 55, 128, 140, 241, 251, 255, 258, 344, 447, 531, 850, 855  
 constrained, 15–18, 20, 22, 761  
 constraint, 407, 847, 807  
 copaths, 45  
 DNA, 770, 773, 775  
 equally-parsimonious, 528, 530  
 equally weighted, 211  
 equal rate, 233  
 evolutionary, 526, 602  
 gene, 63, 179, 193, 258, 374, 446, 583–584, 588, 725, 727, 776  
 genealogical, 515, 517, 521, 524, 526  
 haplotype, 159, 165–166  
 heuristic, 607  
 host, 737, 740  
 likelihood, 39, 506, 508, 762, 764, 802  
 logDet, 4, 7, 614, 621  
 matrix-weighted, 622  
 maximum likelihood, 12, 18, 20, 22, 30, 42–45, 81, 96, 128, 323, 328, 368, 371, 383, 396, 455–456, 479, 574, 576–577, 580–581, 583, 589–590, 607, 611, 666, 677, 681, 762, 767, 771, 781, 825, 827–829, 849  
 maximum parsimony, 4, 110, 213, 215, 217, 240, 242–243, 248, 252, 275, 317, 320, 323, 329, 336, 339–341, 346, 359, 378, 383–384, 444, 446–447, 463, 574, 576–577, 579–581, 589–590, 607–608, 824, 826–828  
 maximum parsimony combined, 16  
 minimum evolution, 506, 580, 610  
 minimum length, 415, 750  
 mitochondrial DNA, 178  
 model, 231, 423, 427, 540, 542, 761, 841–842  
 molecular, 103, 105–106, 386, 389–392, 394–396, 399, 403, 853, 858, 860  
 morphological, 387, 392, 394–396, 409, 503, 860  
 most-parsimonious, 3, 5–7, 15, 55–60, 63, 575, 609, 621, 645, 801, 804, 809, 826, 857–857, 864  
 multiple, 849–851  
 near optimal, 696  
 neighbor-joining, 211, 370, 455, 462–463, 508, 702, 801  
 nontrivial, 485  
 optimal, 4, 8, 17, 20, 121, 128, 320, 341, 357, 696, 760, 850  
 parasite, 740, 742  
 parsimony, 9–10, 39, 42–43, 79, 286, 645, 762, 764, 771, 773, 802–804  
 phylogenetic, 119, 121, 126, 71, 112, 131, 134–135, 244, 289–290, 359, 364–365, 427, 463, 515, 554–555, 669, 671, 685, 692, 715, 749, 760–761, 771, 791, 824, 847, 849  
 polyphyletic, 525  
 pygopodid, 757, 760, 770, 775  
 random, 30, 115, 445, 681  
 rodent, 615  
 rooted duplication, 110–111, 113, 115  
 rooting, 757–780, 865  
 single-gene, 20  
 source, 727, 840–844, 846  
 species, 63, 180, 725, 727  
 SSR, 610–611  
 star, 236  
 strict component consensus, 251  
 strict consensus, 57–58, 61, 323, 339, 344, 737, 826–827  
 strict reduced consensus, 250  
 symmetric-difference, 463  
 tandem duplication, 110–118  
 unconstrained, 761  
 unrooted, 50, 865  
 weighted, 866
- Triassic, 239–252, 749  
 late-, 549, 745, 753  
 lower/middle, 746  
 mid-, 548  
 upper, 746
- Trichogypsia*, 314–315, 317, 323
- Trichogypsiidae, 314
- Trichomycetes, 430
- Trichoptera, 106
- Trichotropidae*, 639  
*cancellata*, 639  
*conica*, 639  
*insignis*, 639

- Trichotropids, 620, 623  
 Trigonioidea, 559  
*Trimeresurus*, 447, 451  
   *albolabris*, 441  
   *tokarensis*, 441  
*Tripedalia cystophora*, 316  
 Triticeae, 383  
 tRNA, 2, 52, 94–95, 139, 296–298, 300–301, 303–308, 383, 396, 406, 460,  
   615, 725, 727, 758, 762, 798  
   sequences, 296, 298  
 tRNA<sup>Asp</sup>, 674  
 tRNA<sup>L</sup>, 73, 76  
*trnL-trnF*, 380–382, 384  
*Trochita*, 619, 623, 631, 639  
   *calyptraeformis*, 631, 639  
*Trogon collaris*, 286  
 Tropidophiidae, 440  
*Tropidophis*  
   *haitianus*, 440  
   *wrighti*, 440  
*Tropidurus*, 689  
 True and false gharials: a nuclear gene phylogeny of Crocodylia, John  
   Harshman, Christopher J. Huddleston, Jonathan P. Bollback,  
   Thomas J. Parsons, and Michael J. Braun, 386–402  
 True sampling, 665–673  
 Tuatara, 286  
*Tulearimia*, 329  
 Tunicata, 520  
*Turdus migratorius*, 287  
*Turitella* sp., 640  
 Turkey, 551  
*Turnix sylvatica*, 286  
*Turtur brehmeri*, 38  
 Two-state characters, 236  
 Two-tailed test, 339  
 Tylopoda, 221  
 Type I error, 18, 42, 273, 279, 505, 615, 666–669, 671–672, 684, 689  
 Type I STS markers are more informative than cytochrome *b* in  
   phylogenetic reconstruction of the Mustelidae (Mammalia:  
   Carnivora), Klaus-Peter Koepfli and Robert K. Wayne, 571–593  
 Type II error, 273, 279, 505, 666, 671–672, 770  
*Typhlomolge*, 504  
 Typhlopidae, 440  
*Typhlops lumbricalis*, 440  
*Typhlotriton spelaeus*, 505  
*Typhothorax*, 241, 243, 248–252  
   *coccinarium*, 254  
*Tyrannus tyrannus*, 286  
 U2 snRNA, 557  
 Ulocentra, 492–493  
 Unambiguous characters, 539, 557  
 Unbiased (see approximately unbiased test)  
 Unconstrained  
   ordination, 687  
   trees, 761  
 Uninformative characters, 76, 217, 575, 581, 826  
 Unionoida, 559  
 Ungulates, 860  
 Unrooted tree, 50, 865  
 Unweighted  
   pair-group average (UPGMA), 205, 229–239, 722  
 UPGMA  
   cluster analysis, 488, 491, 493, 496–497  
   phenogram, 497  
*Upupa epops*, 286  
*Urocolius macrourus*, 286  
 Uropygi, 557  
 Ursidae, 846  
*Ursus*, 706  
 Using a null model to recognize significant co-occurrence prior to  
   identifying candidate areas of endemism, Austin R. Mast and  
   Reto Nyffeler, 271–280  
*Ute*, 314–315  
*Uteopsis*, 314–315  
 Vacelet, Jean, *see* Manuel, Michael, 311–333  
*Vallesia*, 391,  
 Value of idiosyncratic markers and changes to conserved tRNA  
   sequences from the mitochondrial genome of hard ticks (Acari:  
   Ixodida: Ixodidae) for phylogenetic inference, Anna Murrell,  
   Nick J. H. Campbell, and Stephen C. Barker, 296–310  
*Vanikoro*, 622, 639  
   sp. 1, 639  
   sp. 2, 639  
 Varanidae, 757  
*Varecia*, 706  
 Variable rate analysis, 751  
 Vermileonidae, 756  
 Vertebral characters, 439  
 Vertebrate, 56, 58–59, 261–262, 264, 296, 388, 403, 515, 518, 524, 526,  
   571, 706  
   phylogenetics, 388  
 Vespidae, 23  
 Vicariance, 549–553, 717–723, 794–819  
 Villet, Martin H., *see* Kelly, Christopher M., 439–459  
 Violet turaco, 388  
*Vipera*, 451  
   *ammodytes*, 441  
   *ursinii*, 441  
 Viperidae, 439, 441, 447, 452–453, 455  
 Viperinae, 441, 447, 453  
 Viverridae, 846  
*v-myc*, 388  
 Volatiles, 334–351  
*Vombatus ursinus*, 285  
 Vos, R. A., Accelerated likelihood surface exploration: the likelihood  
   ratchet, 368–373  
*Vosmaeropsis*, 314–315, 320, 322–325, 328, 333  
   sp., 316  
 Vulture, black, 388  
   vWF, 605, 614–615, 738  
 Wagner, Warren L., *see* Nepokroeff, Molly, 820–841  
*Waldsteinia*, 374, 381–383  
   *geoides*, 374, 376, 381–382  
 Wallace's Line, 794–819  
 Wasps  
   parasitoid, 430  
   vespid, 23  
 Watson-Crick pairing, 131  
*Waxy* (see also Granule-bound starch synthase), 374–385  
 Wayne, Robert K., *see* Koepfli Klaus-Peter, 571–593  
 Weasels, 571–573  
   long-tailed, 573  
 Weevils, 717  
 Weighted  
   parsimony, 283  
   tree, 866  
 Weiss, Robert E., *see* Suchard, Marc A., 48–54, 649–664  
 Whales, 707–708, 724, 853, 855, 858  
   baleen, 707–708

- fin, 210  
 phylogeny, 853  
 toothed, 707–708  
 When are phylogenetic analyses misled by convergence? a case study in Texas cave salamanders, John J. Wiens, Paul T. Chippindale, and David M. Hillis, 501–514  
 When do parasites fail to speciate in response to host speciation?, Kevin P. Johnson, Richard J. Adams, Roderic D. M. Page, and Dale H. Clayton, 37–47  
 Wiegmann, Brian M., David K. Yeates, Jeffrey L. Thorne, and Hirohisa Kishino, Time flies, a new molecular time-scale for Brachyceran fly evolution without a clock, 745–756  
 Wiens, John J., Missing data, incomplete taxa, and phylogenetic accuracy, 528–538  
 Wiens, John J., Paul T. Chippindale, and David M. Hillis, When are phylogenetic analyses misled by convergence? a case study in Texas cave salamanders, 501–514  
 Wilcoxon  
   rank sum, 337, 345  
   signed rank test, 406, 668, 857  
   *T*-distribution, 345  
 Wilkinson, Mark, François-Joseph Lapointe, and David J. Gower, Branch lengths and support, 127–130  
 Wilkinson, Mark, *see* François-Joseph Lapointe, 865–868  
 Wilkinson, Mark, *see* Harris, Simon R., 239–252, 851–852  
 Williams, David M. and Christopher J. Humphries, Component coding, three-item coding, and consensus methods, 255–258  
 Winka, Katarina, *see* Cummings, Michael P., 477–487  
 Winteraceae, 346  
 Wishart distribution, 652  
 Wolverine, 573  
 Woodchuck, 193, 195, 197–198  
 Wombat, 285  
 Wright–Fisher model, 179  
  
 Xenoderminae, 439, 441, 447, 452–453, 457  
 Xenodermus, 451  
   *javanicus*, 441  
 Xenodon, 447, 451  
   *neuwoiedi*, 441  
   *servus*, 441  
  
 Xenodontinae, 439, 441, 447, 452, 455–456  
 Xenodontini, 447, 456  
*Xenophora pallidula*, 640  
*Xenopus laevis*, 286  
*Xenopus laevis*, 286  
 Xia, Xuhua, Zheng Xie, and Karl M. Kjer, 18S Ribosomal RNA and tetrapod phylogeny, 283–295  
 Xie, Zheng, *see* Xia, Xuhua, 283–295  
 Xiphosura, 557  
*Xylocopa*, 8  
   *bombylans*, 2, 5  
 Xylocopinae, 1–2, 9  
 Xylocopini, 1, 3, 9  
*Xylomya parens*, 756  
 Xylomyidae, 746, 756  
 Xylophagidae, 756  
 Xylophagid flies, 745  
 Xylophagomorpha, 745–746, 750–751, 756  
  
 Yacare caiman, 388  
 Yang, Ziheng and Anne D. Yoder, Comparison of likelihood and Bayesian methods for estimating divergence times using multiple gene loci and calibration points, with application to a radiation of cute-looking mouse lemur species, 705–716  
 Yeates, David K., *see* Wiegmann, Brian M., 745–756  
 Yoder, Anne D., *see* Yang, Ziheng, 705–716  
  
 Zapodidae, 614  
*Zapus*, 614  
   *princeps*, 606  
*Zeacrypta*, 636  
*Zegalerus*, 632, 639  
   *tenuis*, 639  
*Zenaida*, 45  
   *galapagoensis*, 38, 45  
 Zimmer, Elizabeth A., *see* Nepokroeff, Molly, 820–841  
 Zorilla, 573  
 Zwickl, Derrick J., *see* Hillis, David M., 124–126  
 Zygethobiini, 559  
*Zygethobius*, 559
